# Supplementary material
Source: PubMed Central journal article supplement (PMC8096242)
Supplement: ciaa1128_suppl_supplementary_figure1.pdf [file ciaa1128_suppl_supplementary_figure1.pdf]

# EGF

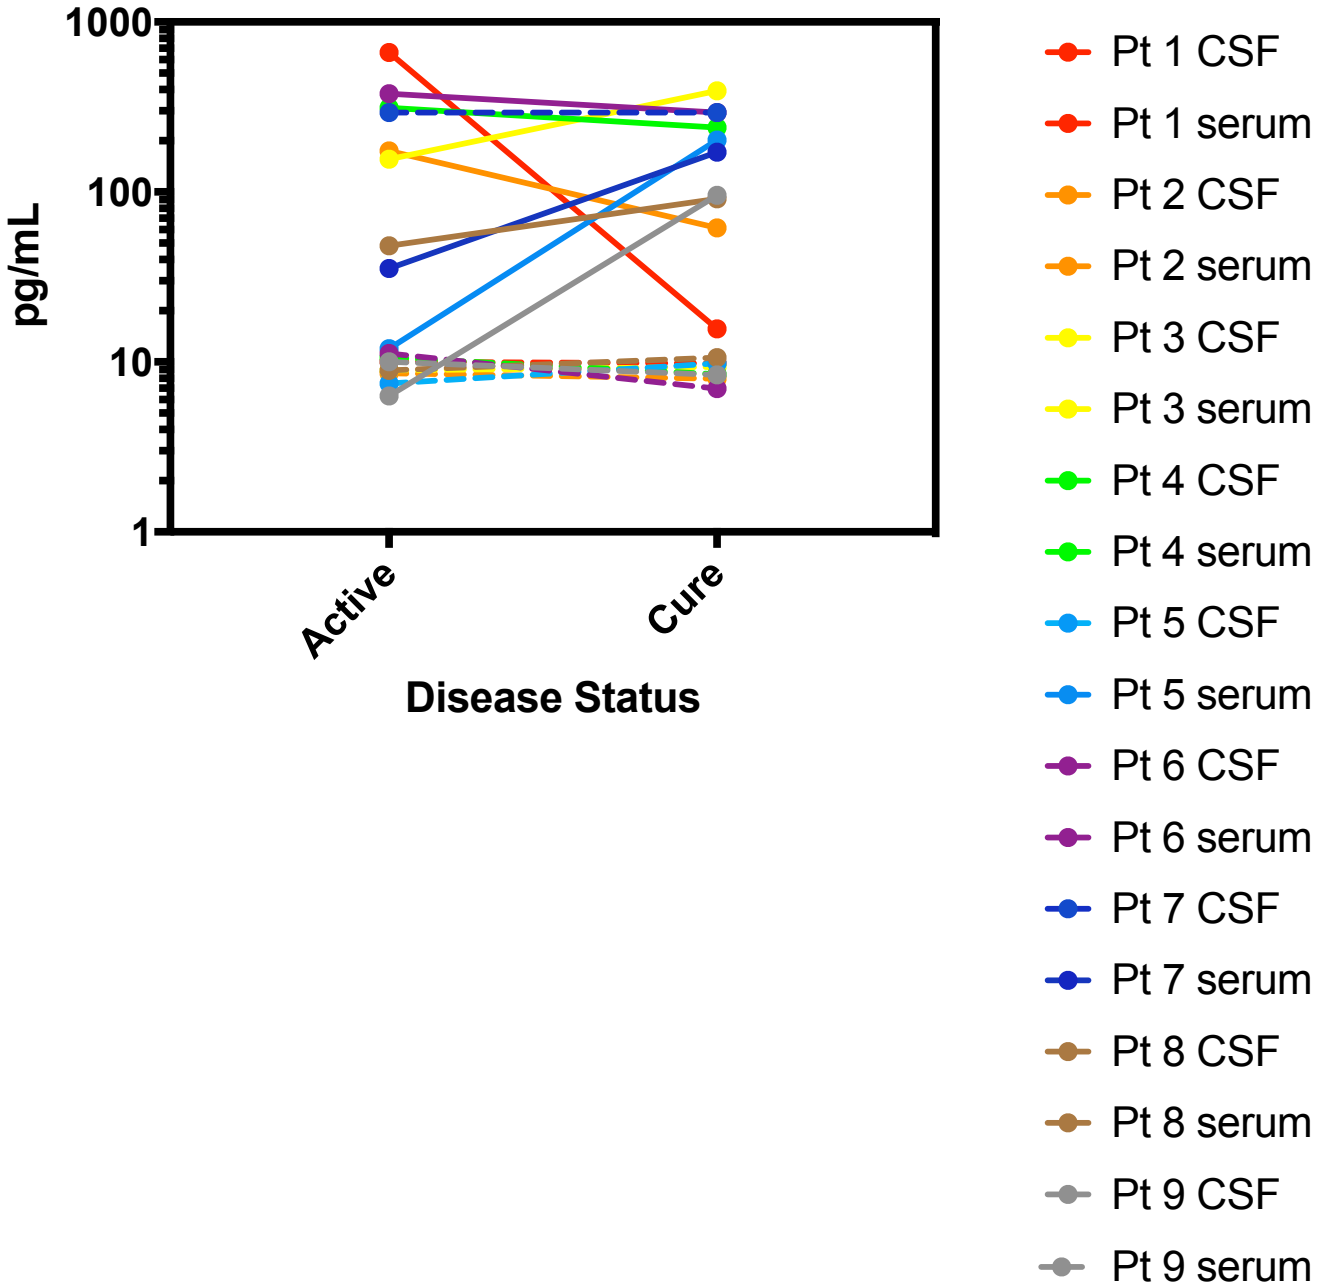

# Eotaxin

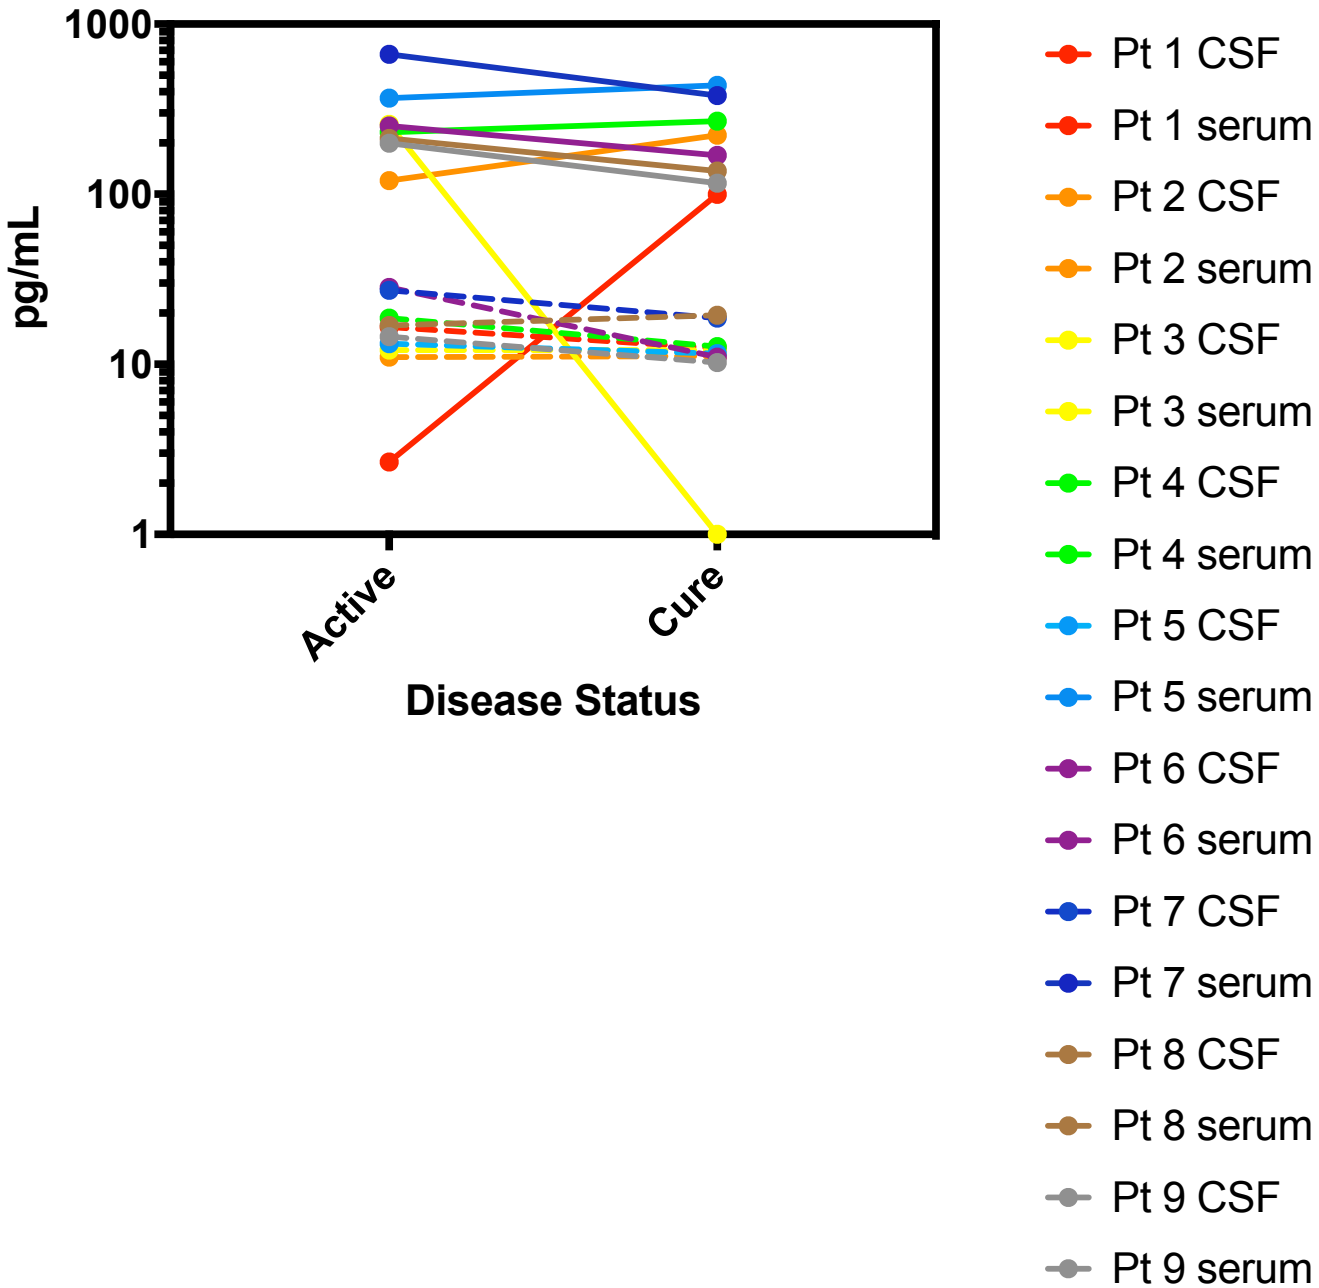

# GCSF

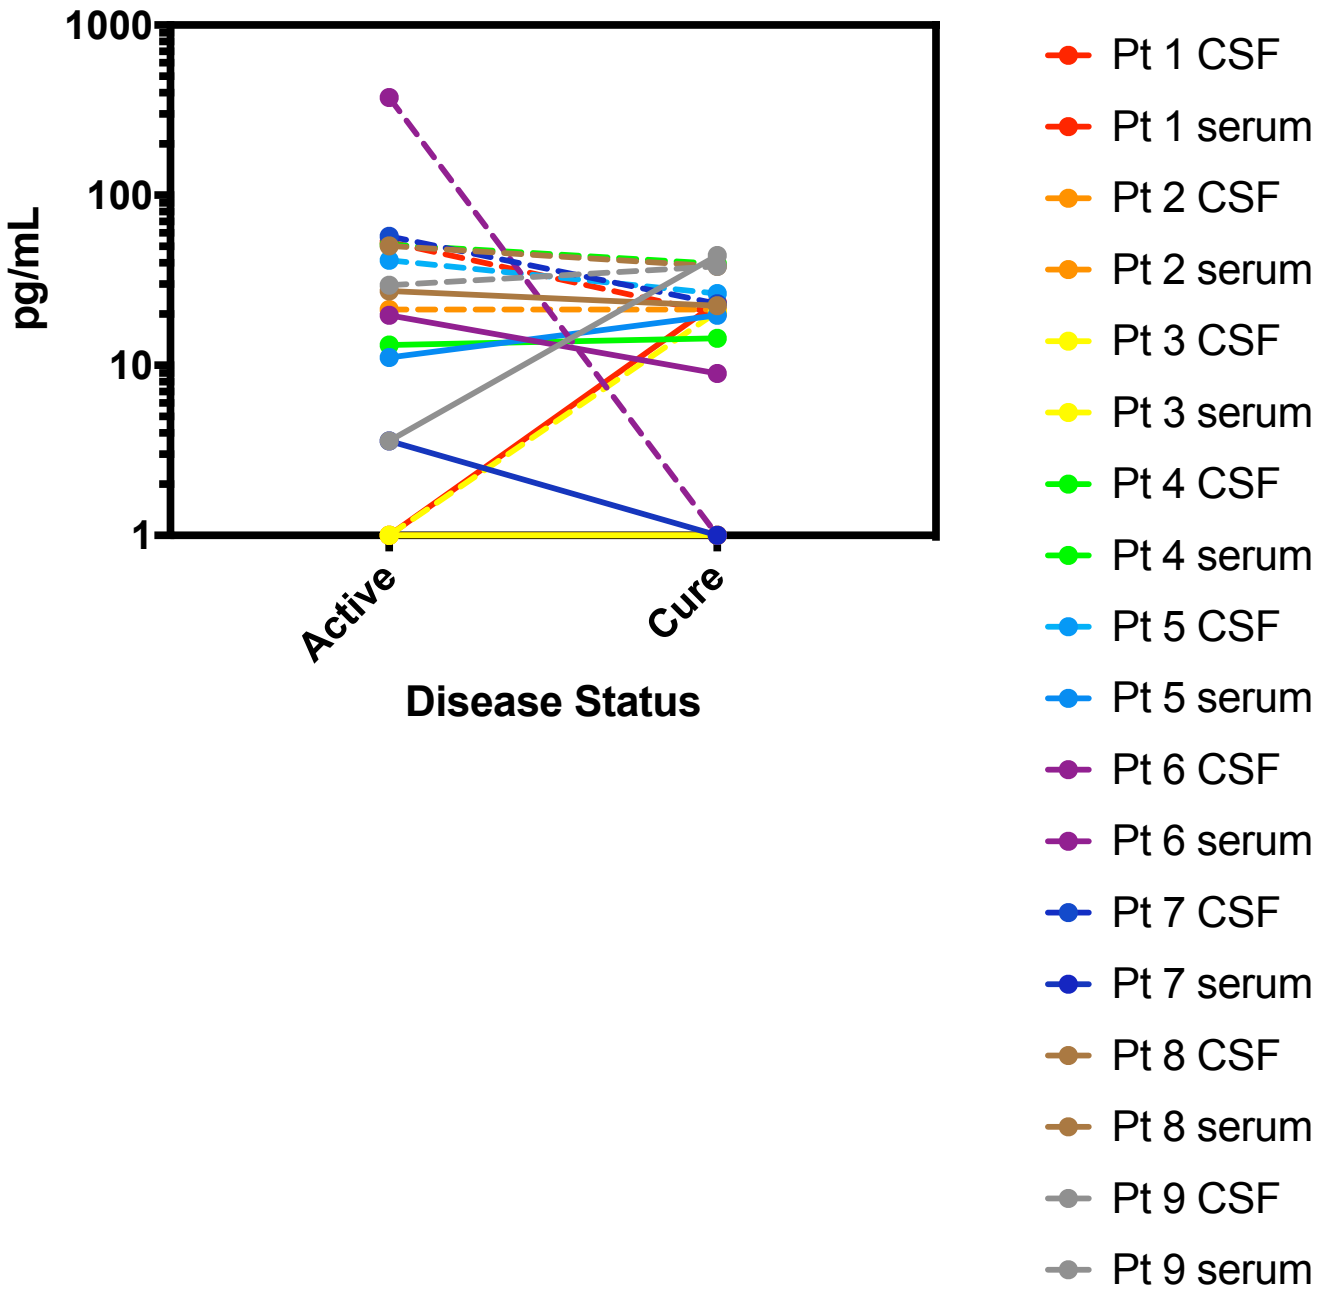

# GM-CSF

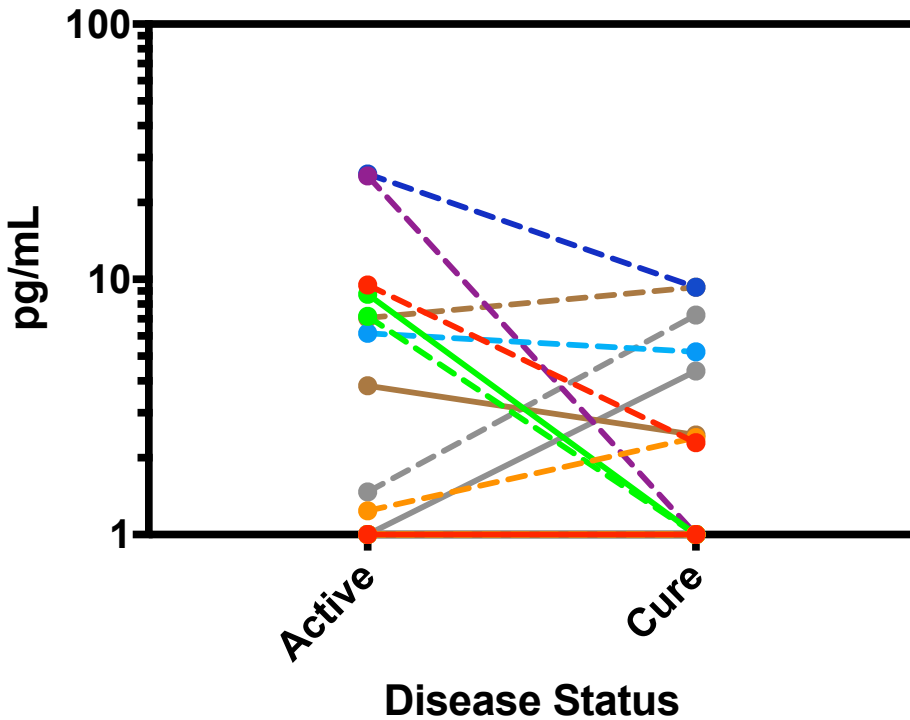

- Pt 9 serum
- Pt 9 CSF
- Pt 8 serum
- Pt 8 CSF
- Pt 7 serum
- Pt 7 CSF
- Pt 6 serum
- Pt 6 CSF
- Pt 5 serum
- Pt 5 CSF
- Pt 4 serum
- Pt 4 CSF
- Pt 3 serum
- Pt 3 CSF
- Pt 2 serum
- Pt 2 CSF
- Pt 1 serum
- Pt 1 CSF

# IFNa2

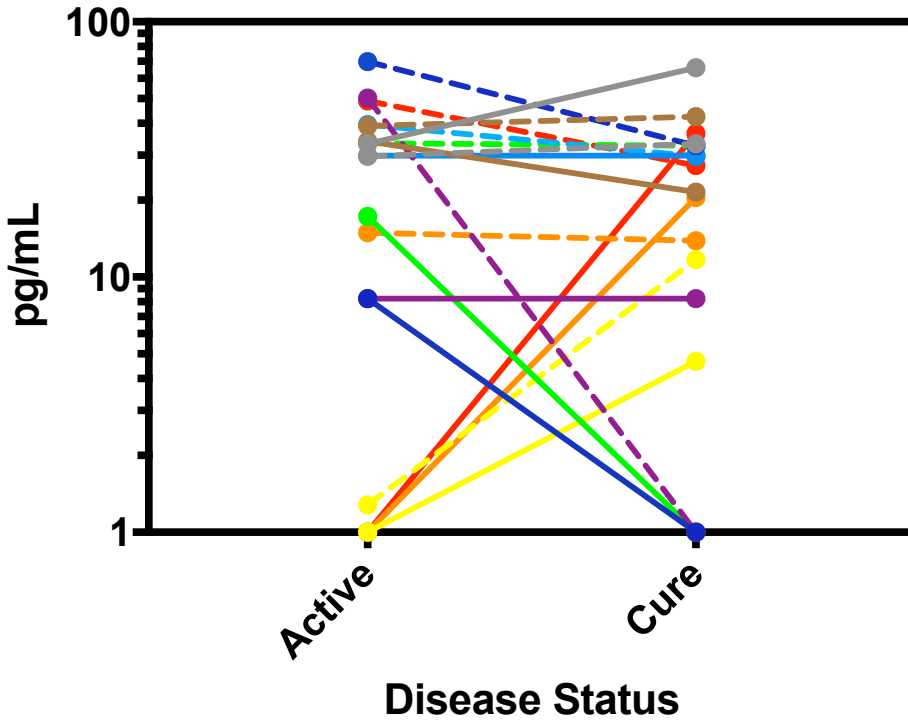

- Pt 1 CSF
- Pt 1 serum
- Pt 2 CSF
- Pt 2 serum
- Pt 3 CSF
- Pt 3 serum
- Pt 4 CSF
- Pt 4 serum
- Pt 5 CSF
- Pt 5 serum
- Pt 6 CSF
- Pt 6 serum
- Pt 7 CSF
- Pt 7 serum
- Pt 8 CSF
- Pt 8 serum
- Pt 9 CSF
- Pt 9 serum

# IFN $\gamma$

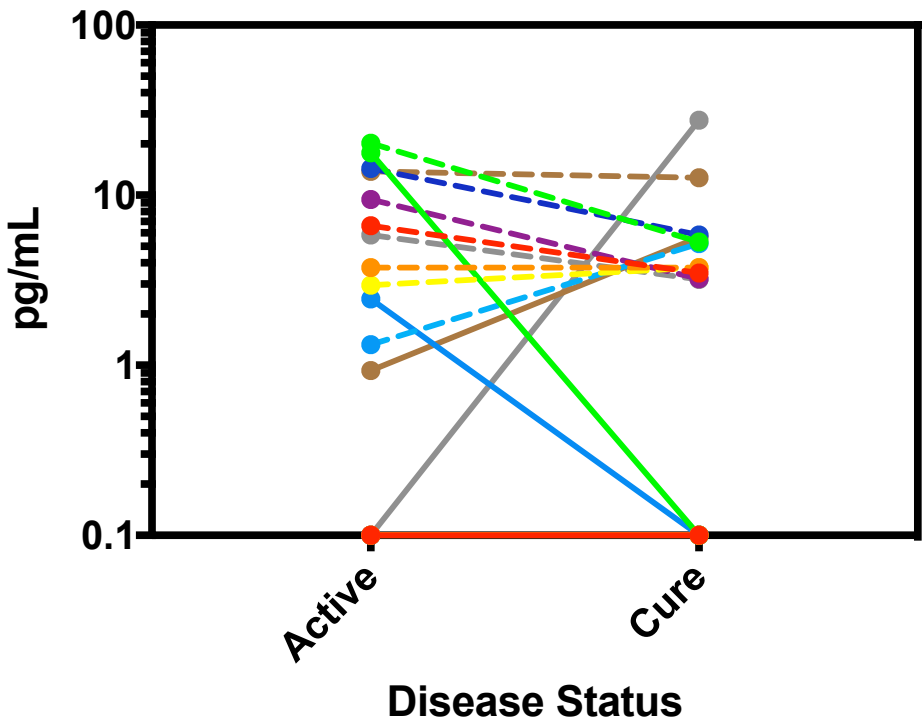

- Pt 9 serum
- Pt 9 CSF
- Pt 8 serum
- Pt 8 CSF
- Pt 7 serum
- Pt 7 CSF
- Pt 6 serum
- Pt 6 CSF
- Pt 5 serum
- Pt 5 CSF
- Pt 4 serum
- Pt 4 CSF
- Pt 3 serum
- Pt 3 CSF
- Pt 2 serum
- Pt 2 CSF
- Pt 1 serum
- Pt 1 CSF

# IL1a

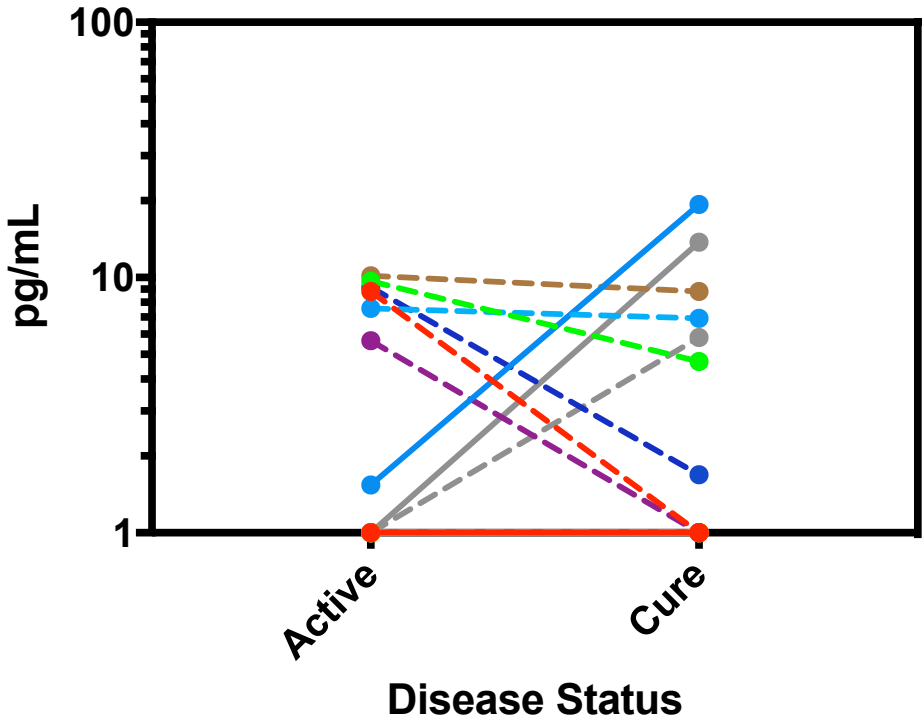

- Pt 9 serum
- Pt 9 CSF
- Pt 8 serum
- Pt 8 CSF
- Pt 7 serum
- Pt 7 CSF
- Pt 6 serum
- Pt 6 CSF
- Pt 5 serum
- Pt 5 CSF
- Pt 4 serum
- Pt 4 CSF
- Pt 3 serum
- Pt 3 CSF
- Pt 2 serum
- Pt 2 CSF
- Pt 1 serum
- Pt 1 CSF

# IL1b

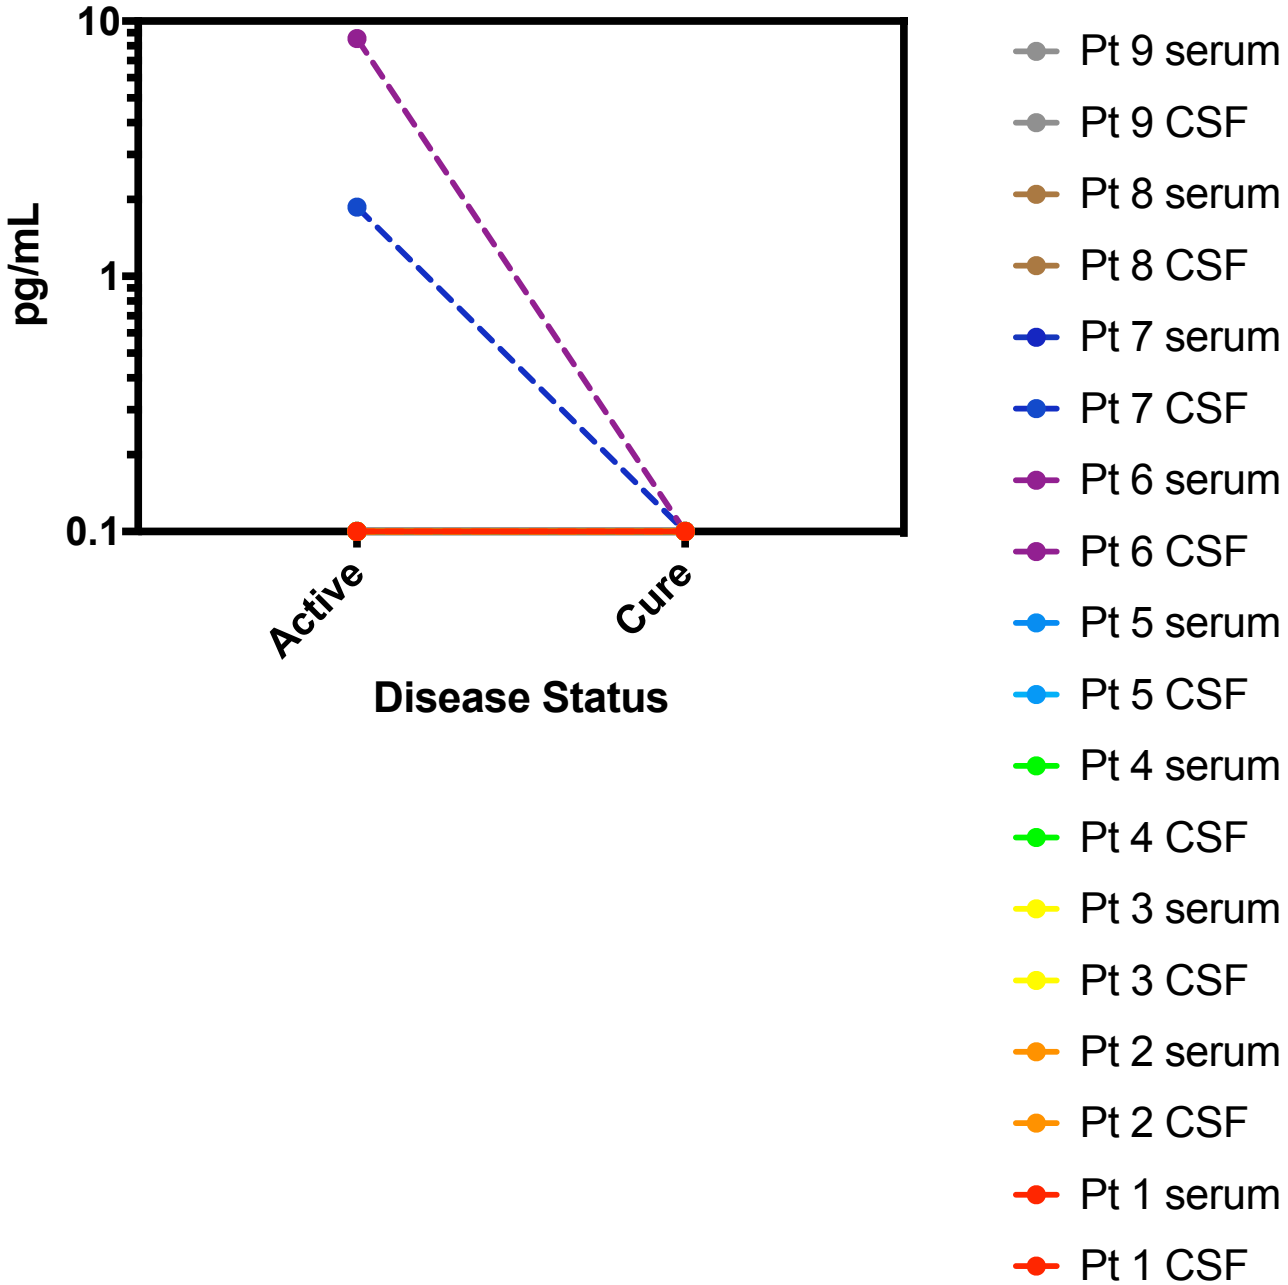



# IL1ra

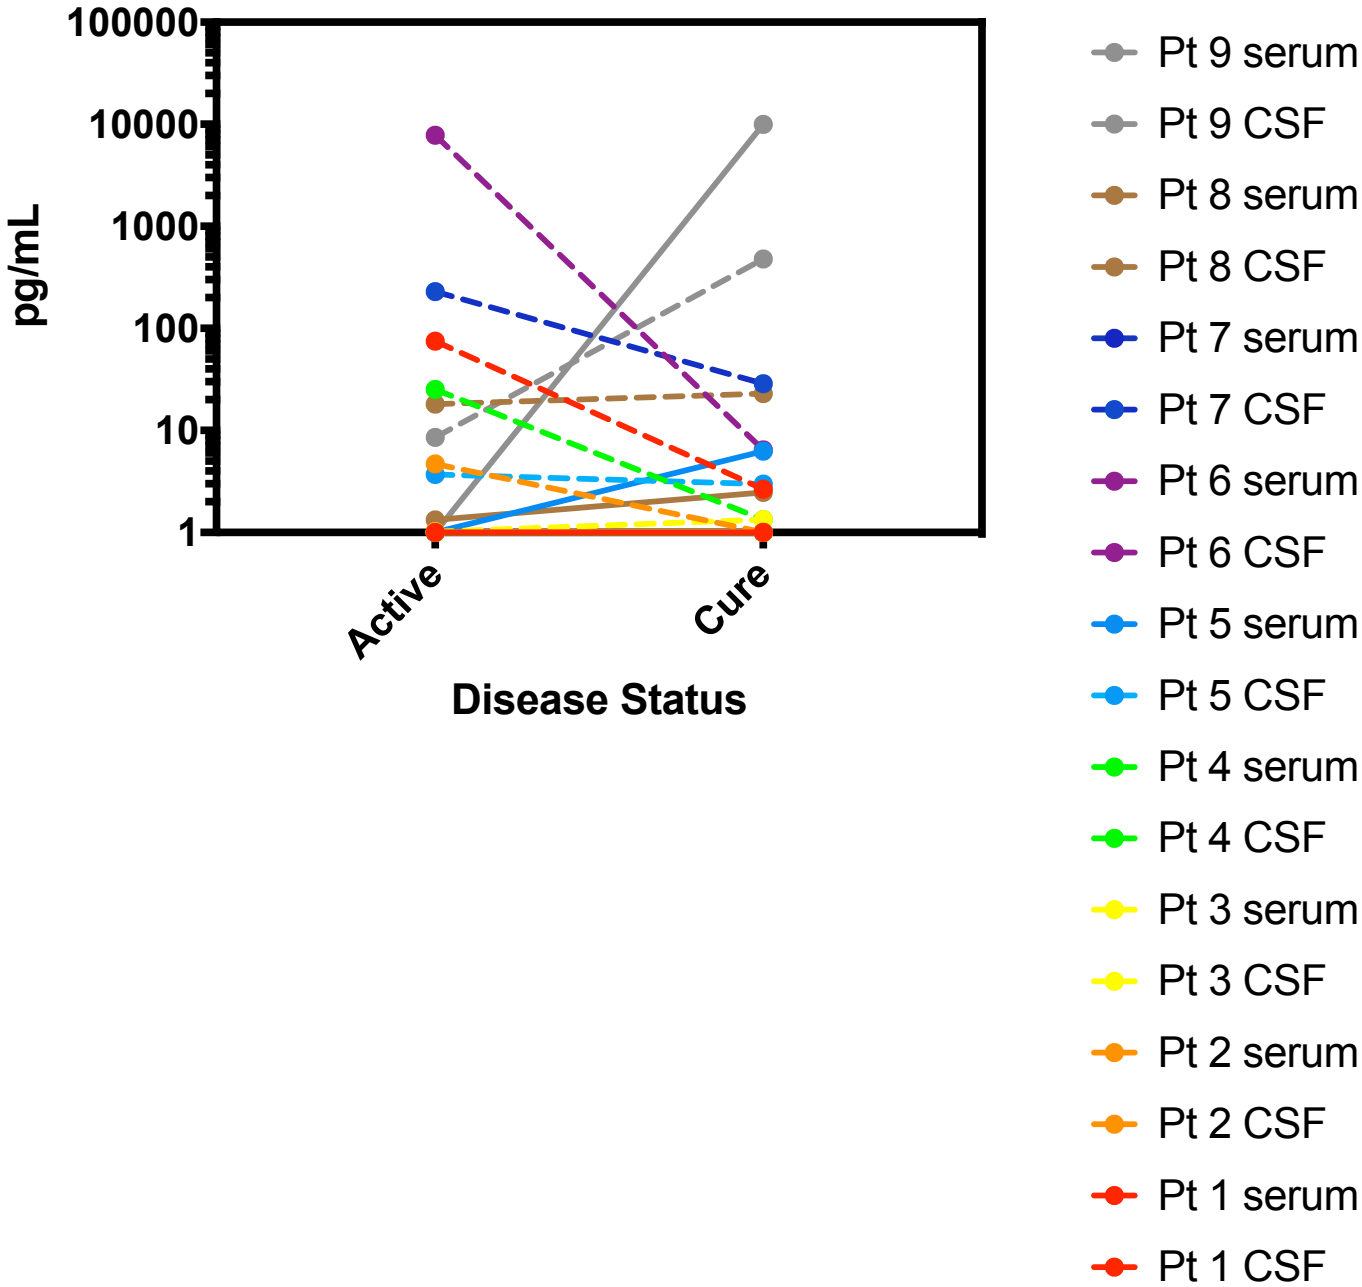

# IL2

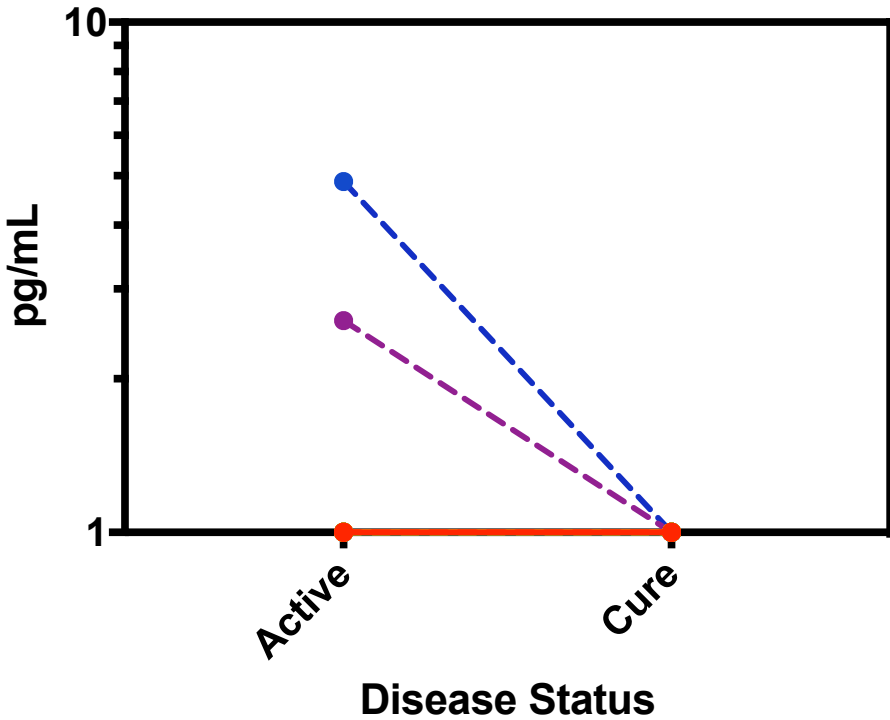

- Pt 9 serum
- Pt 9 CSF
- Pt 8 serum
- Pt 8 CSF
- Pt 7 serum
- Pt 7 CSF
- Pt 6 serum
- Pt 6 CSF
- Pt 5 serum
- Pt 5 CSF
- Pt 4 serum
- Pt 4 CSF
- Pt 3 serum
- Pt 3 CSF
- Pt 2 serum
- Pt 2 CSF
- Pt 1 serum
- Pt 1 CSF

# IL3

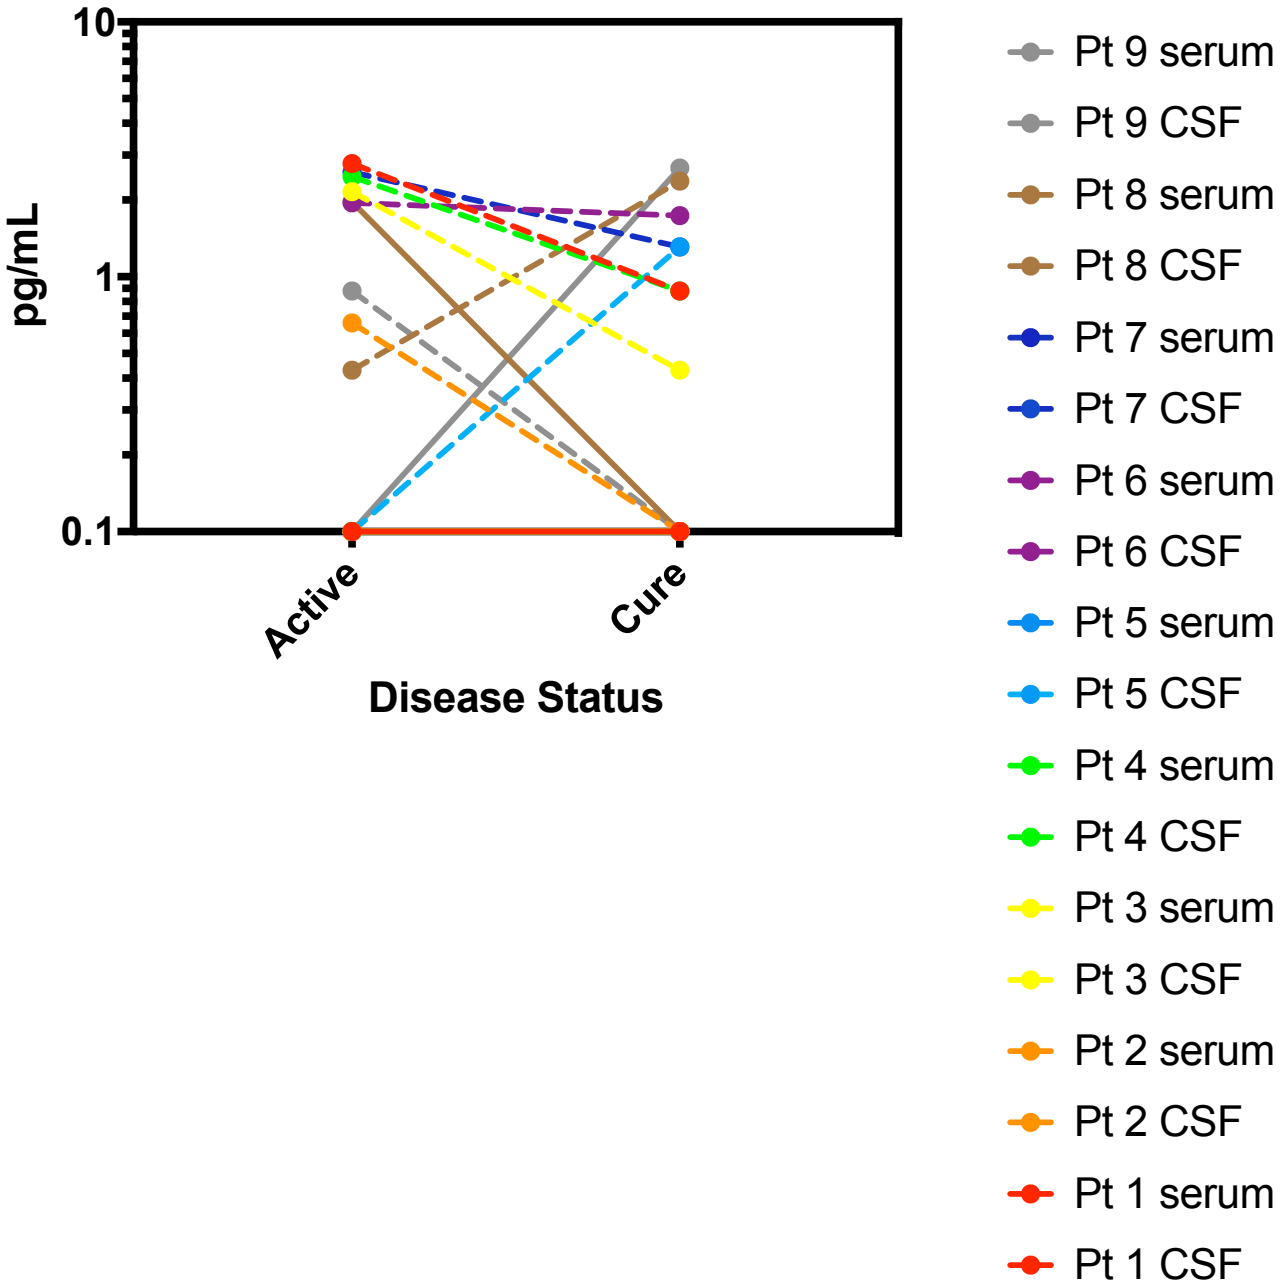

# IL4

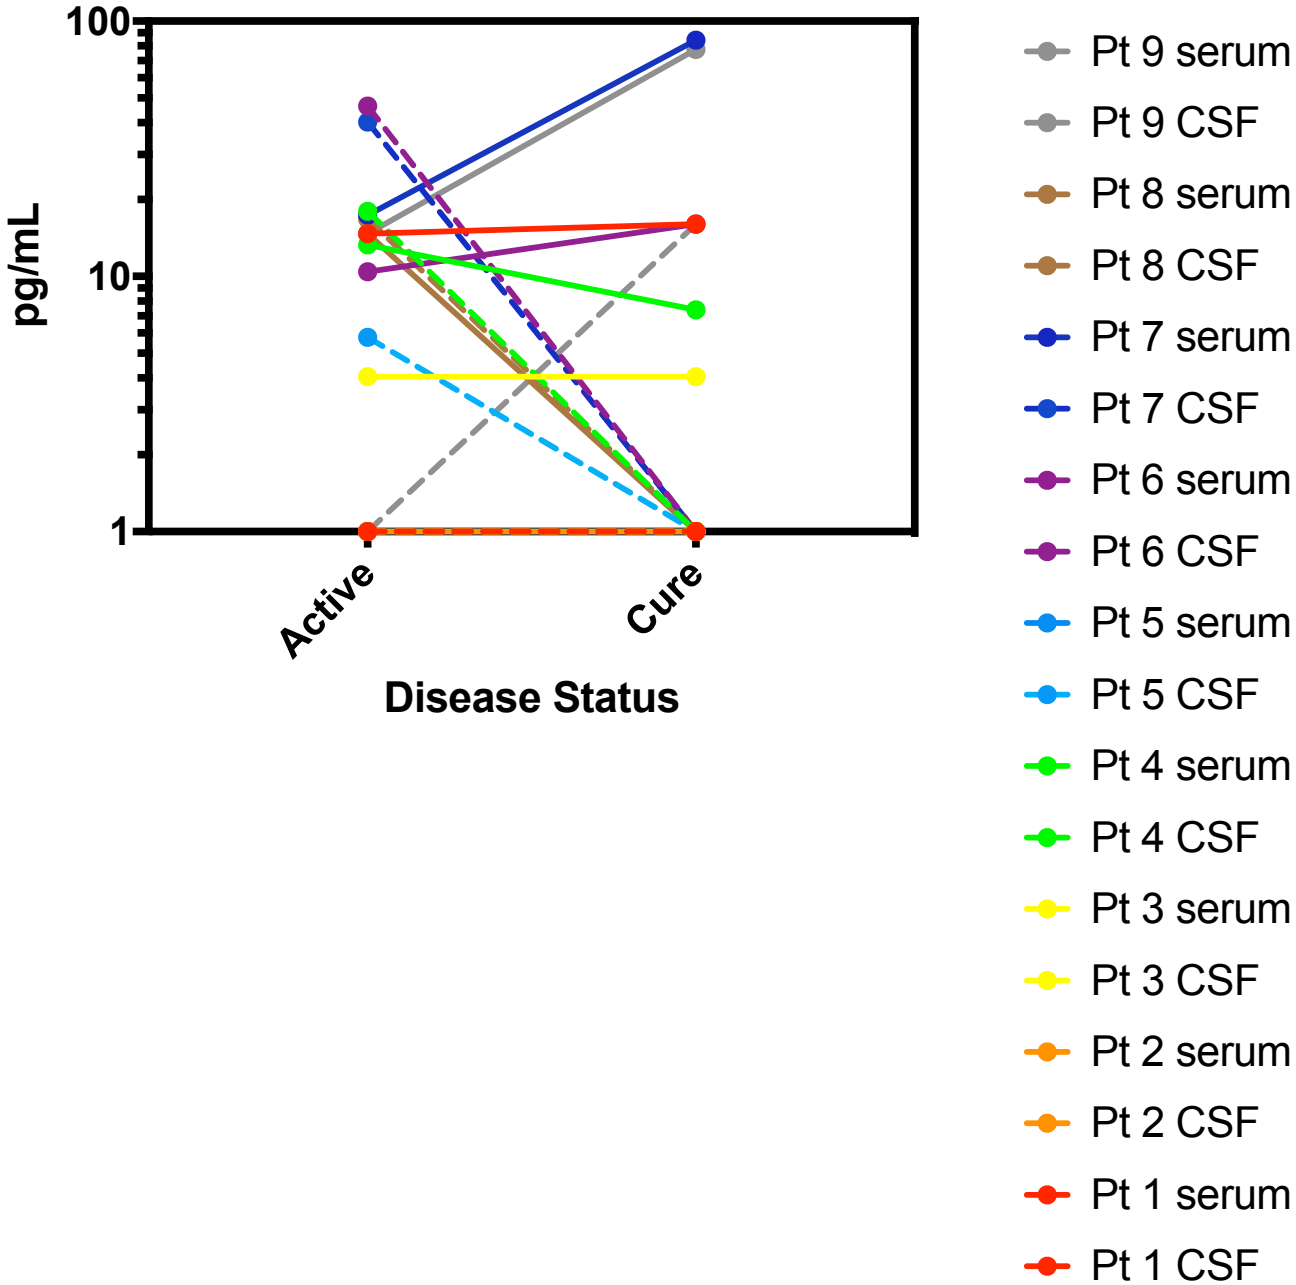

# IL5

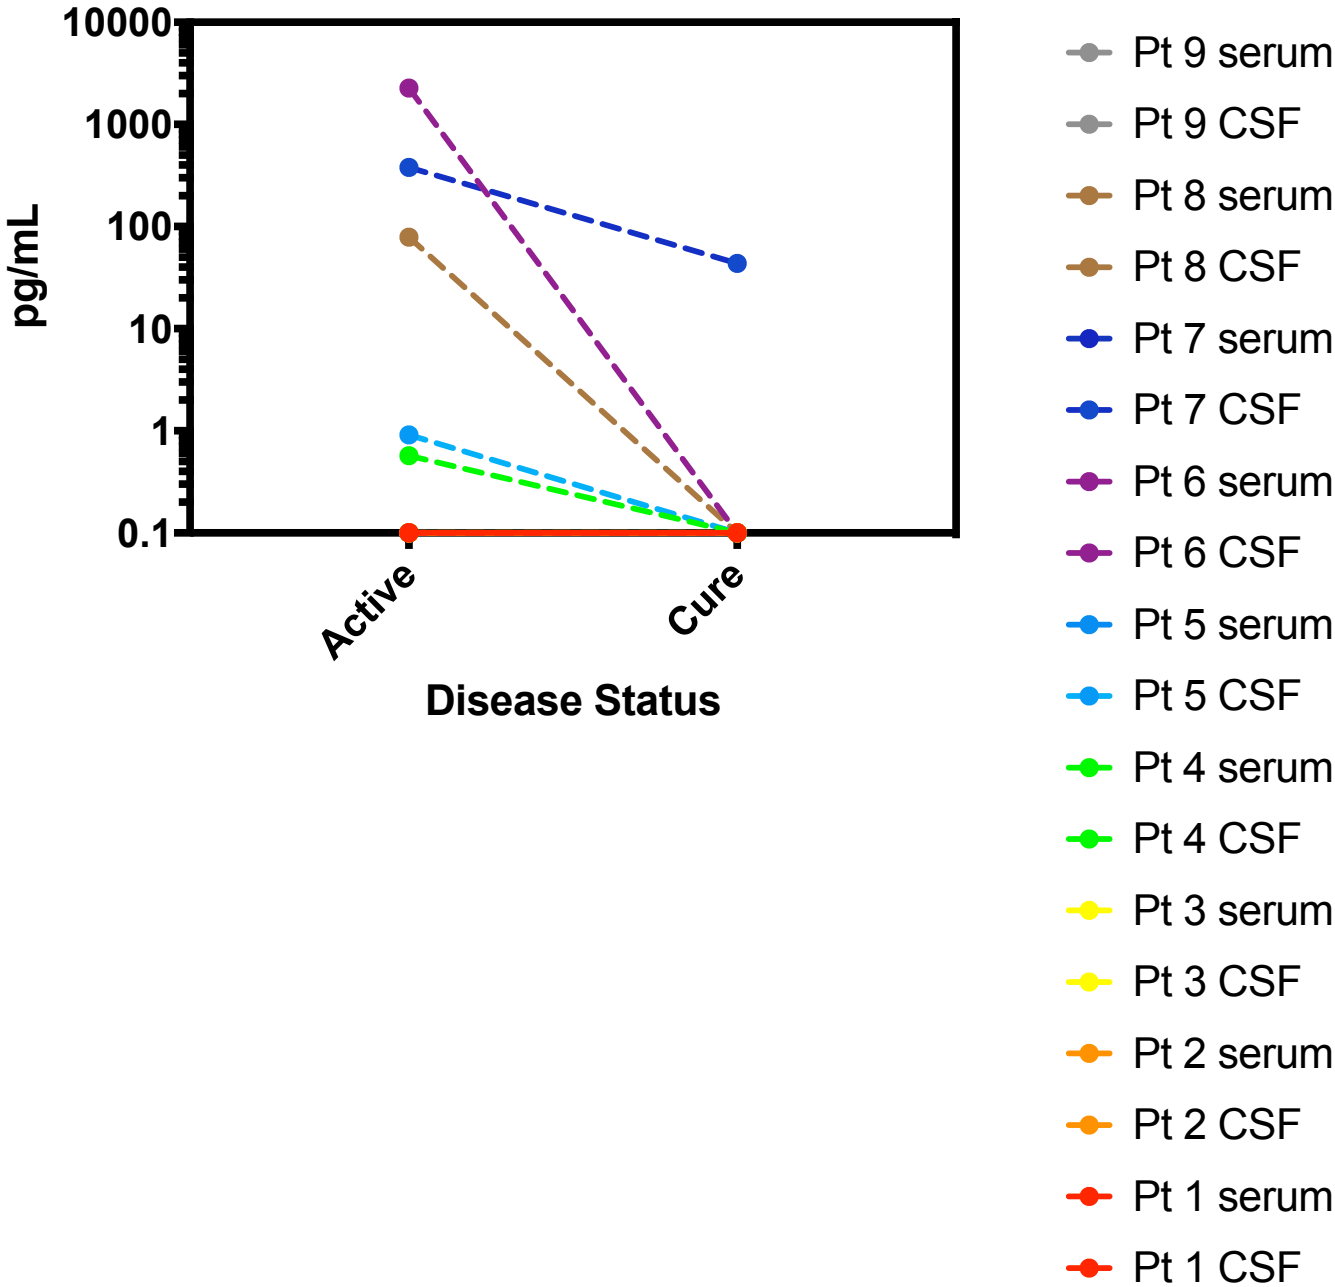

# IL-6

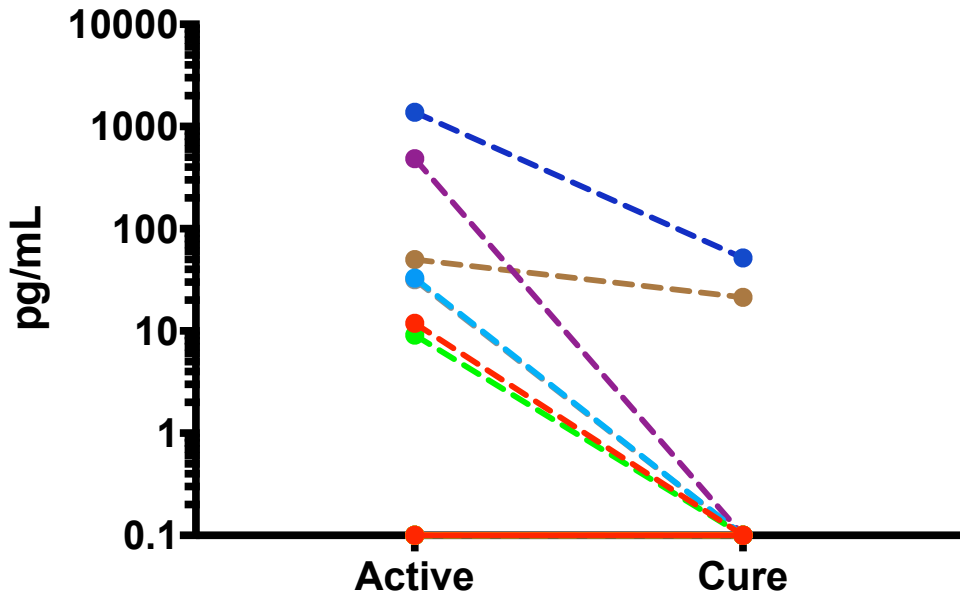

# IL7

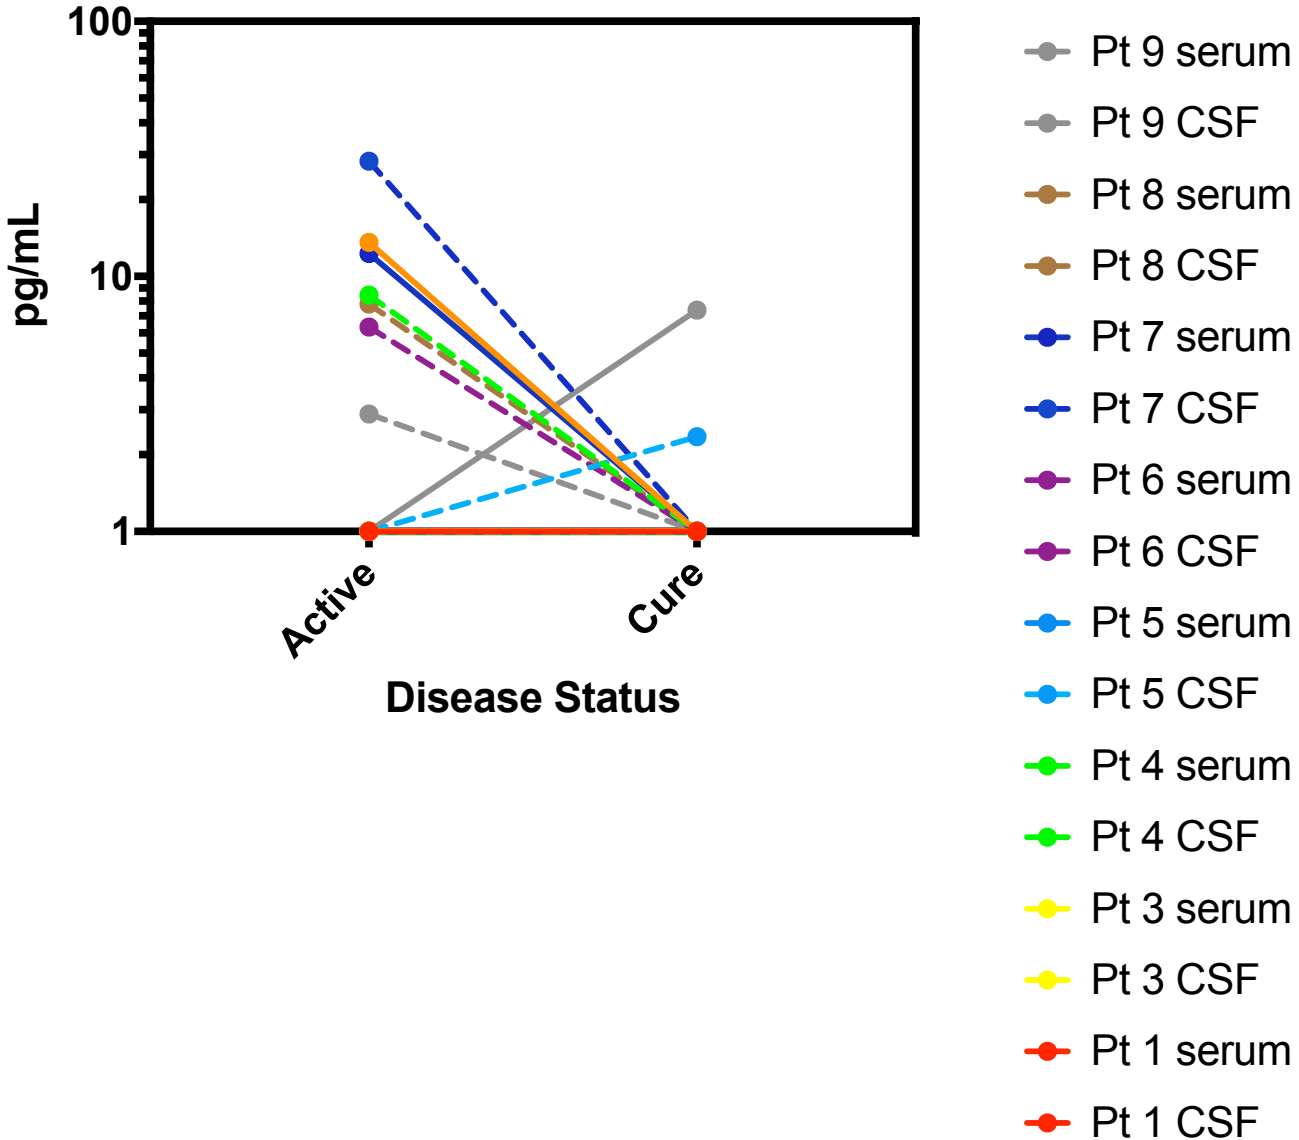

# IL8

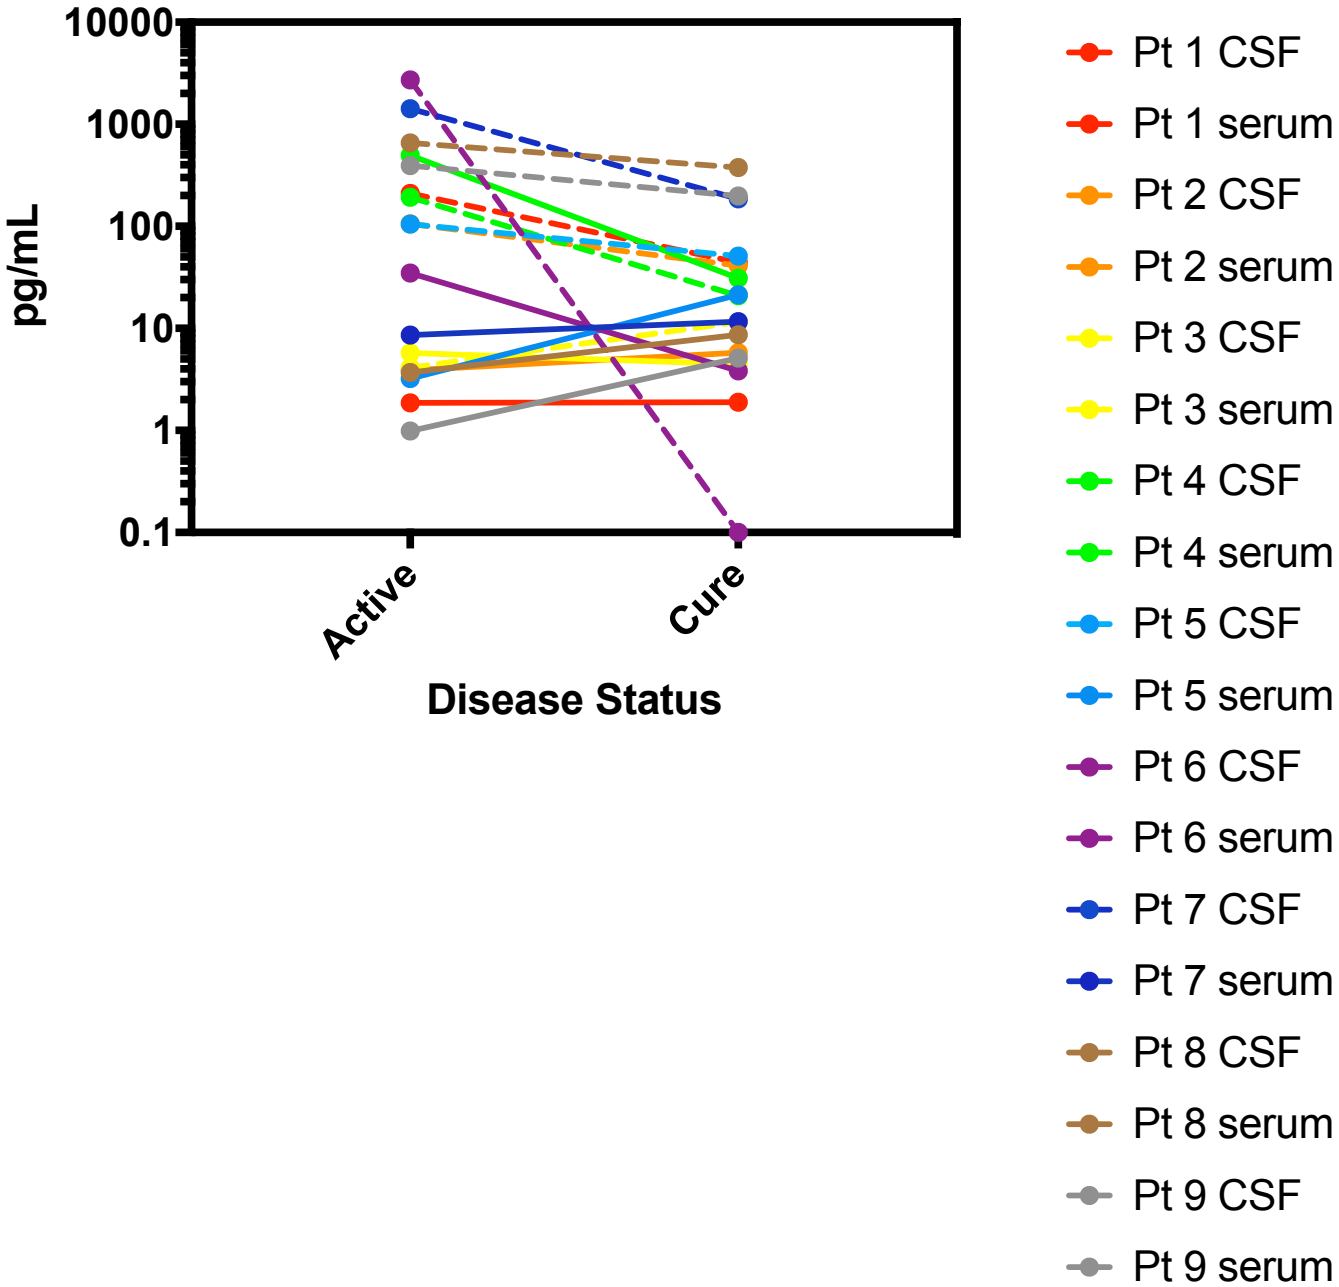



# IL-10

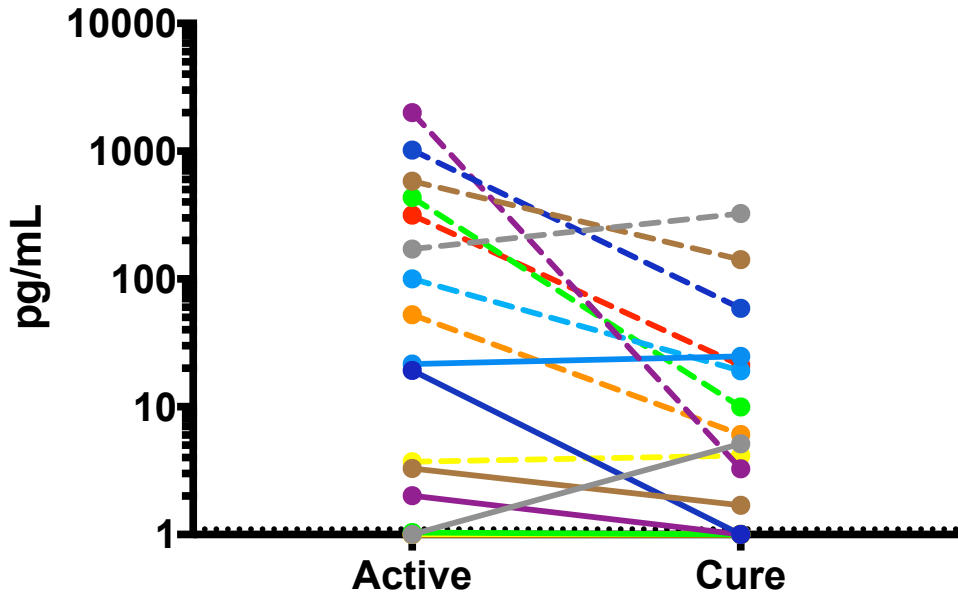

# IL12p40

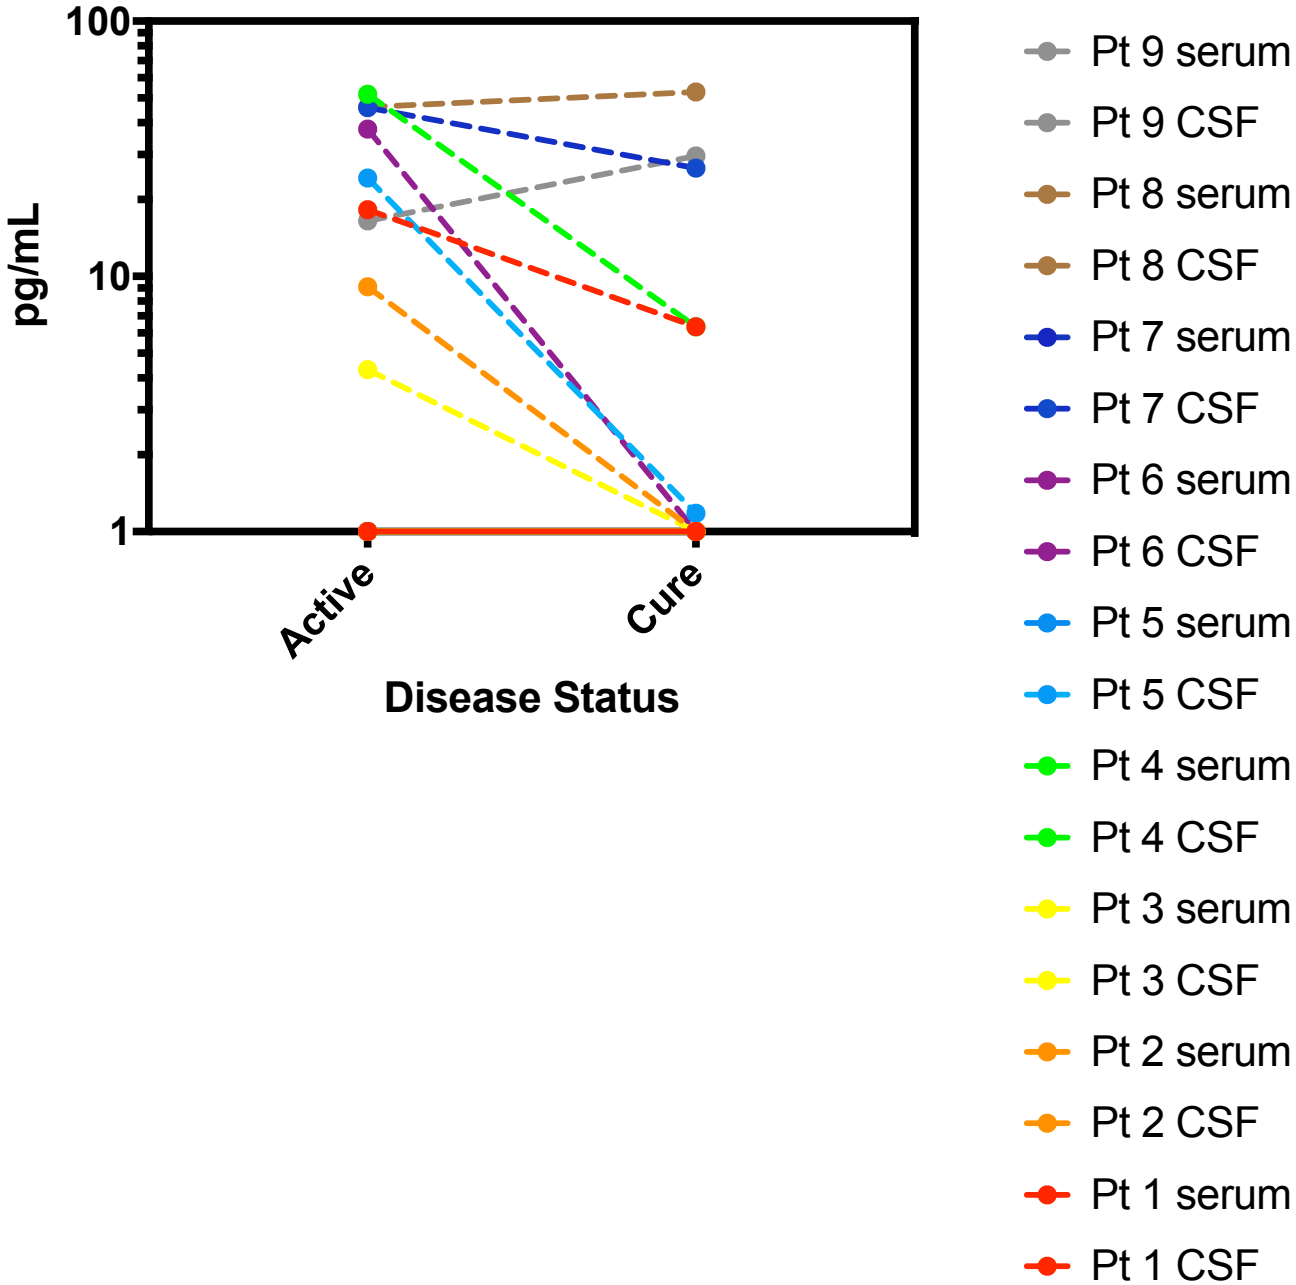

# IL12p70

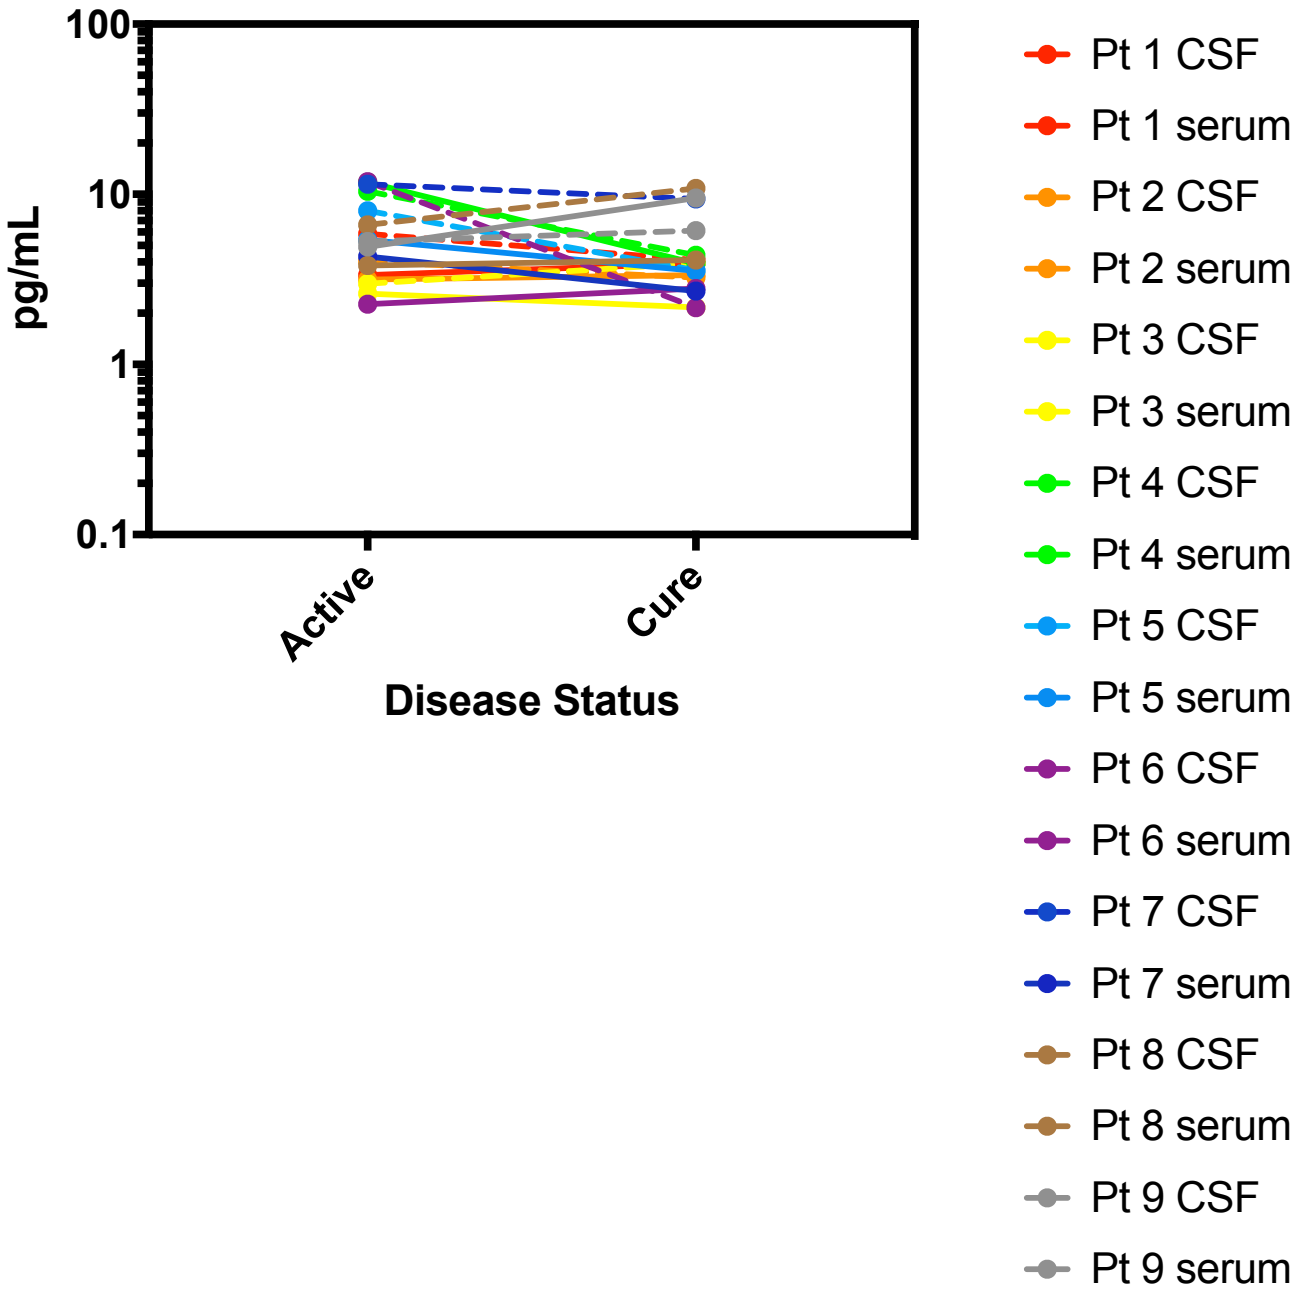

# IL13

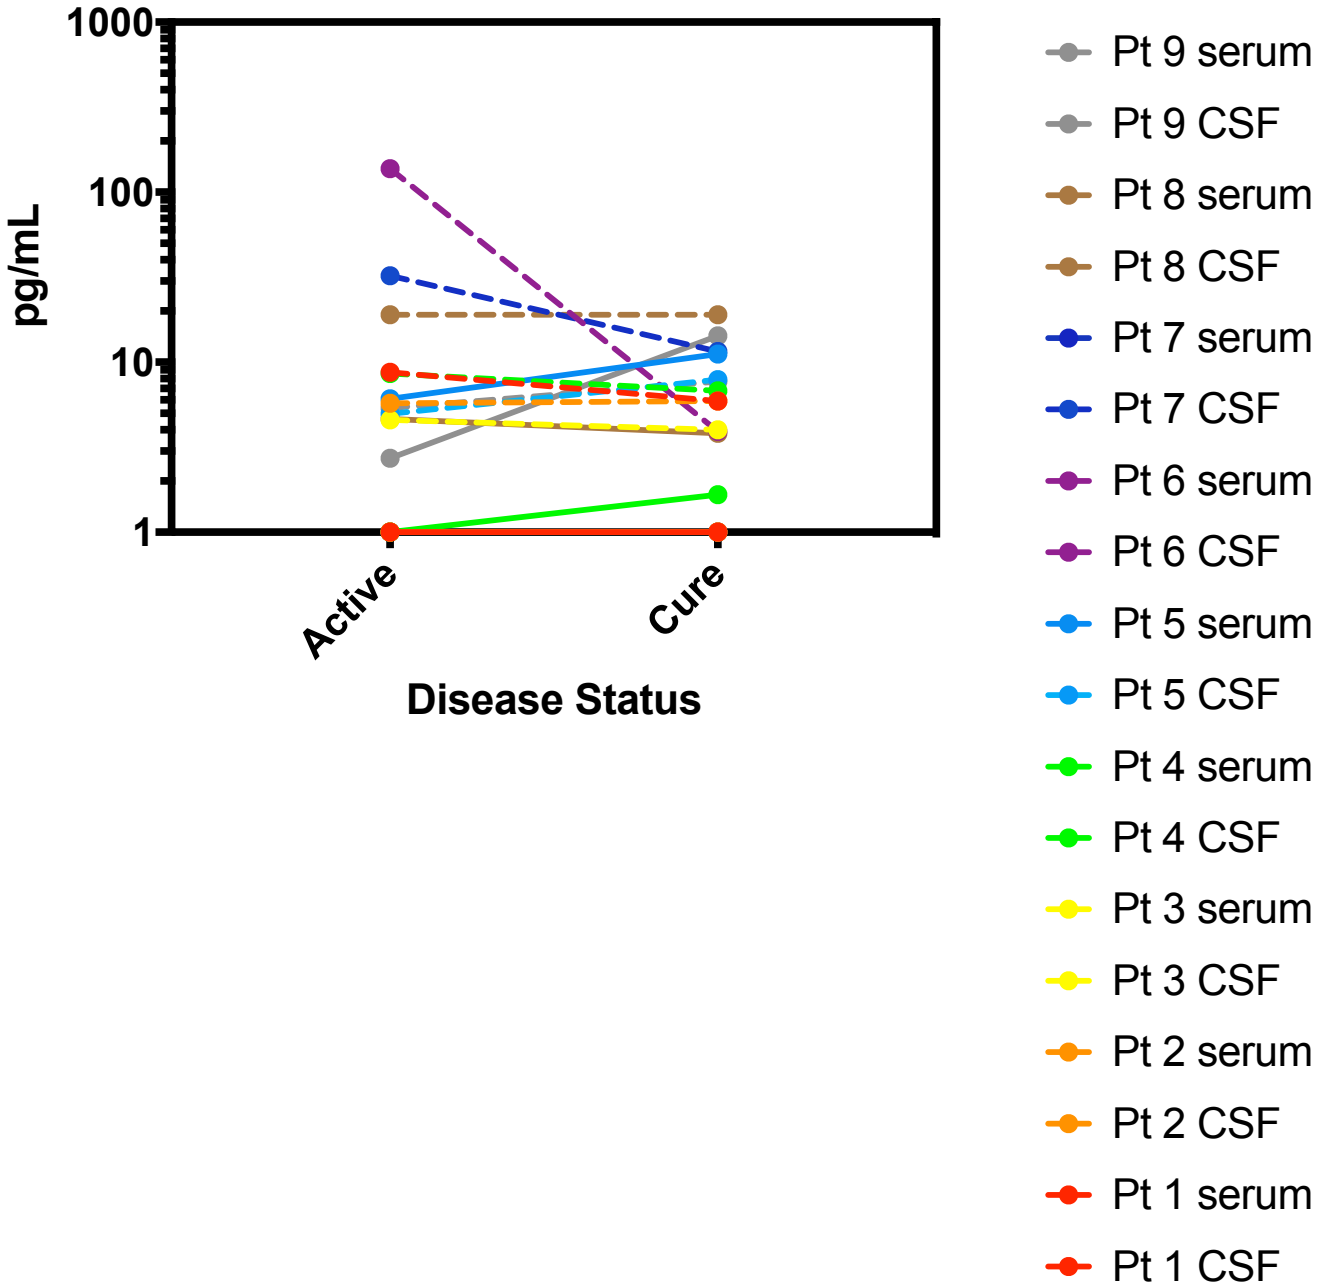

# IL15

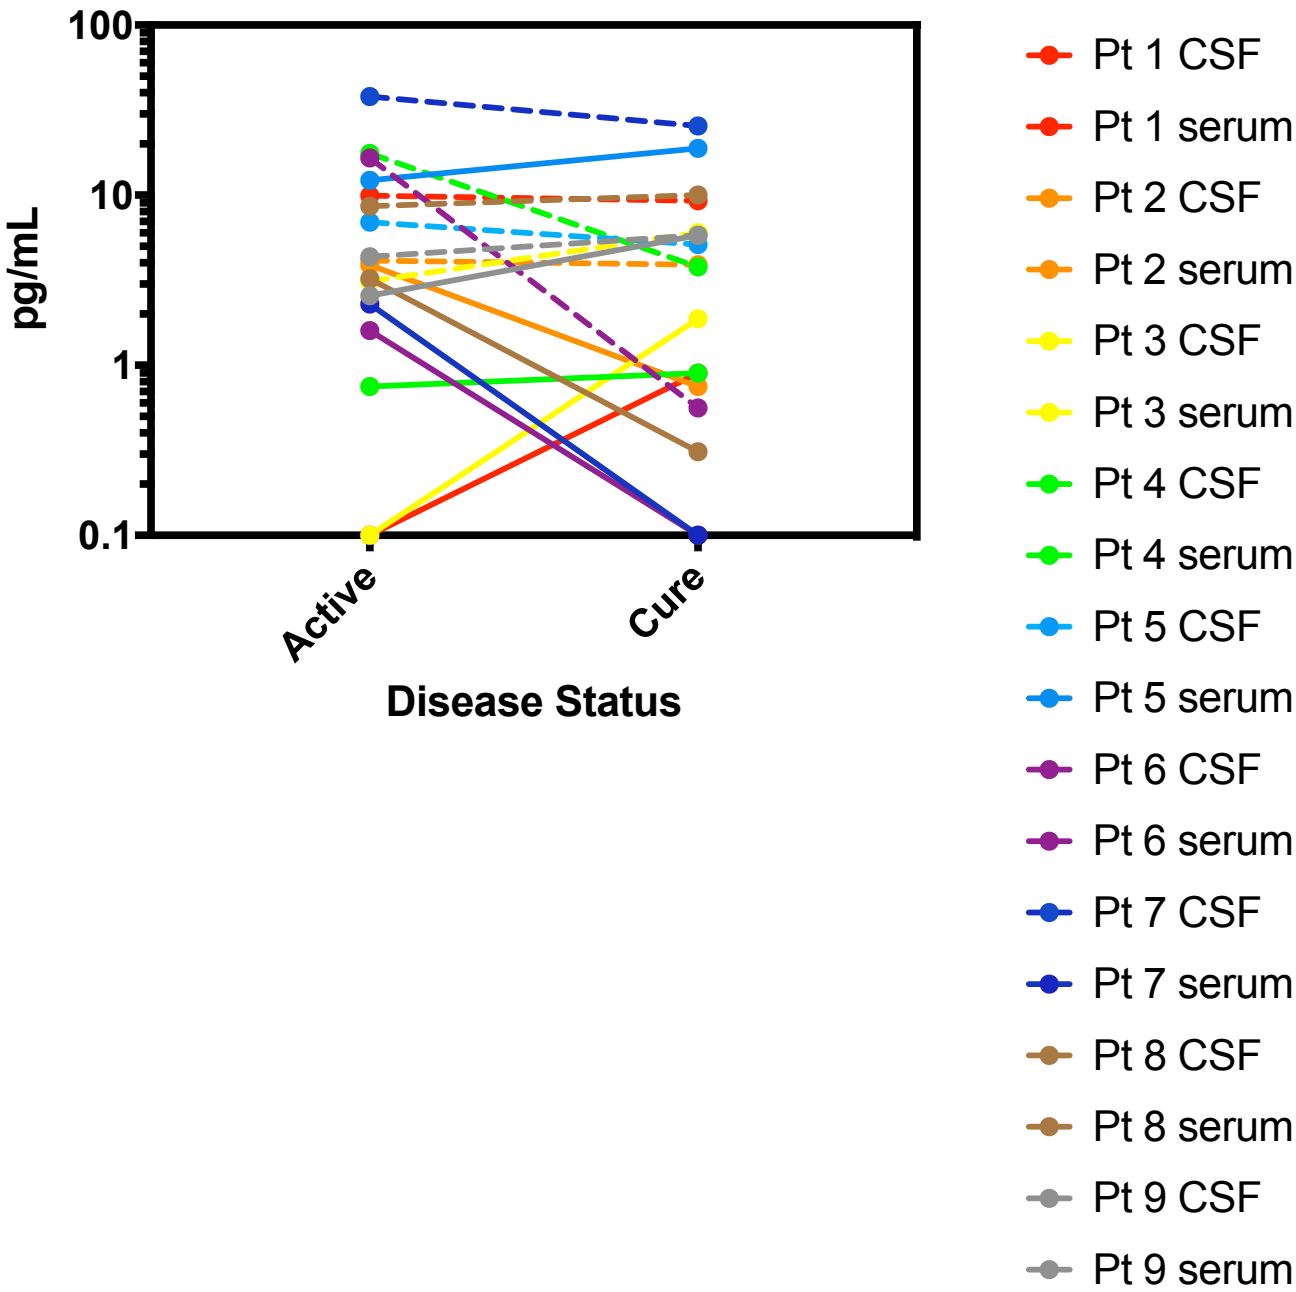

# IL17A

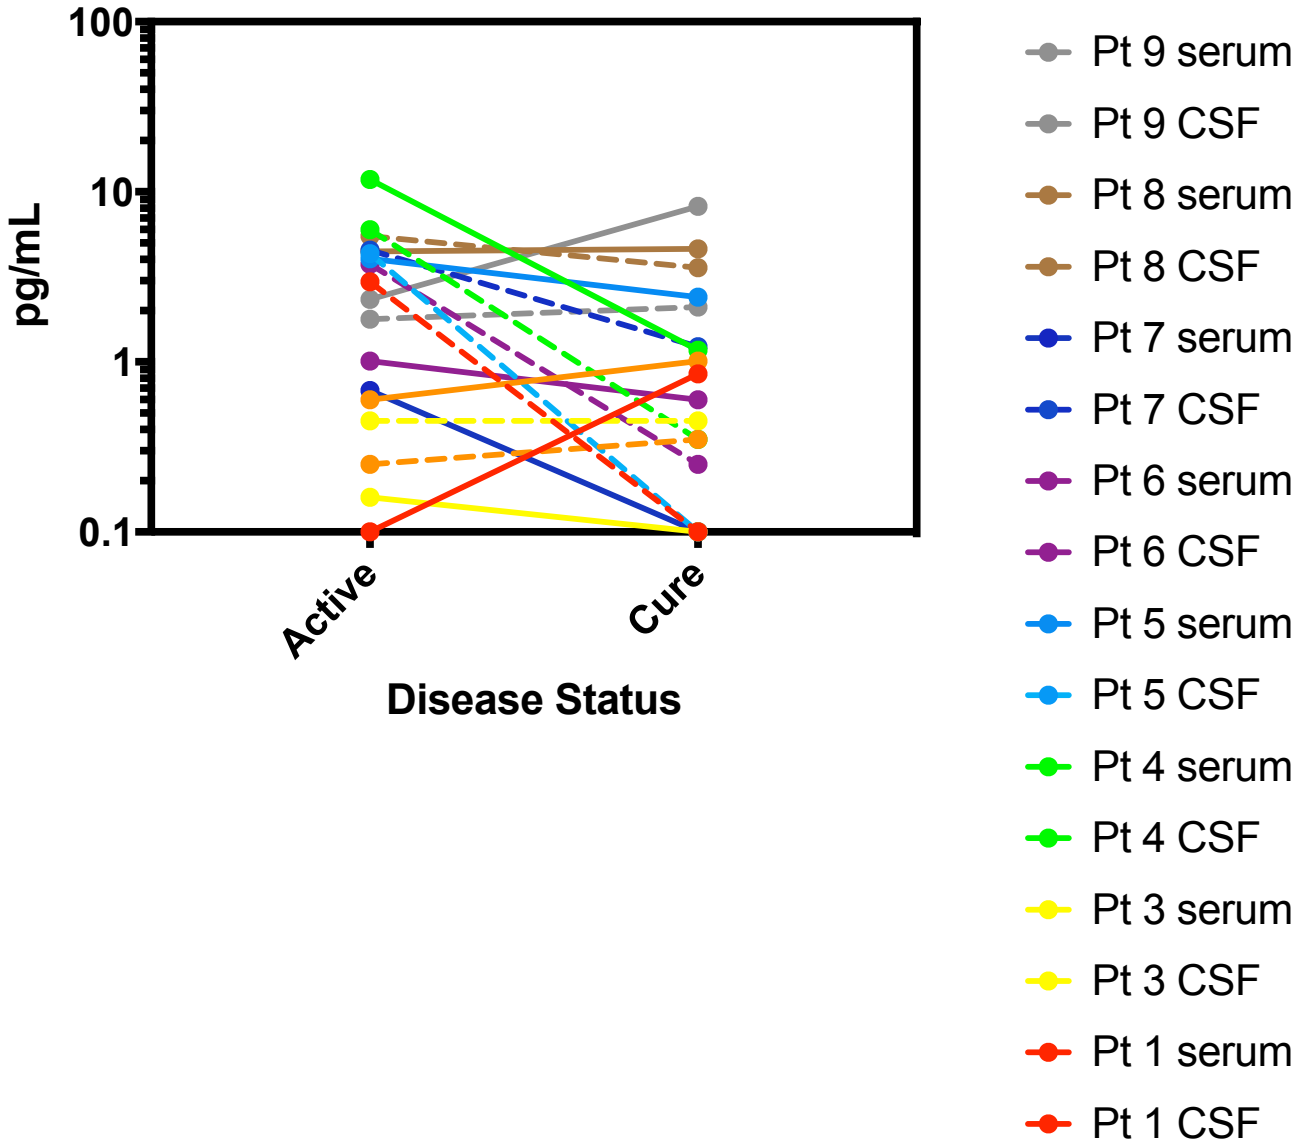

# IP-10

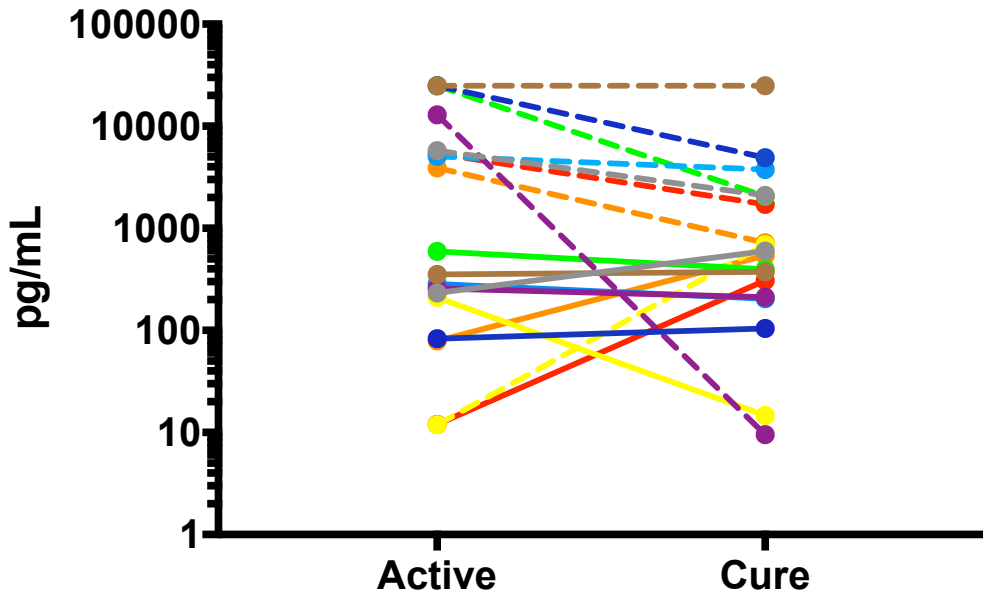

# MCP1

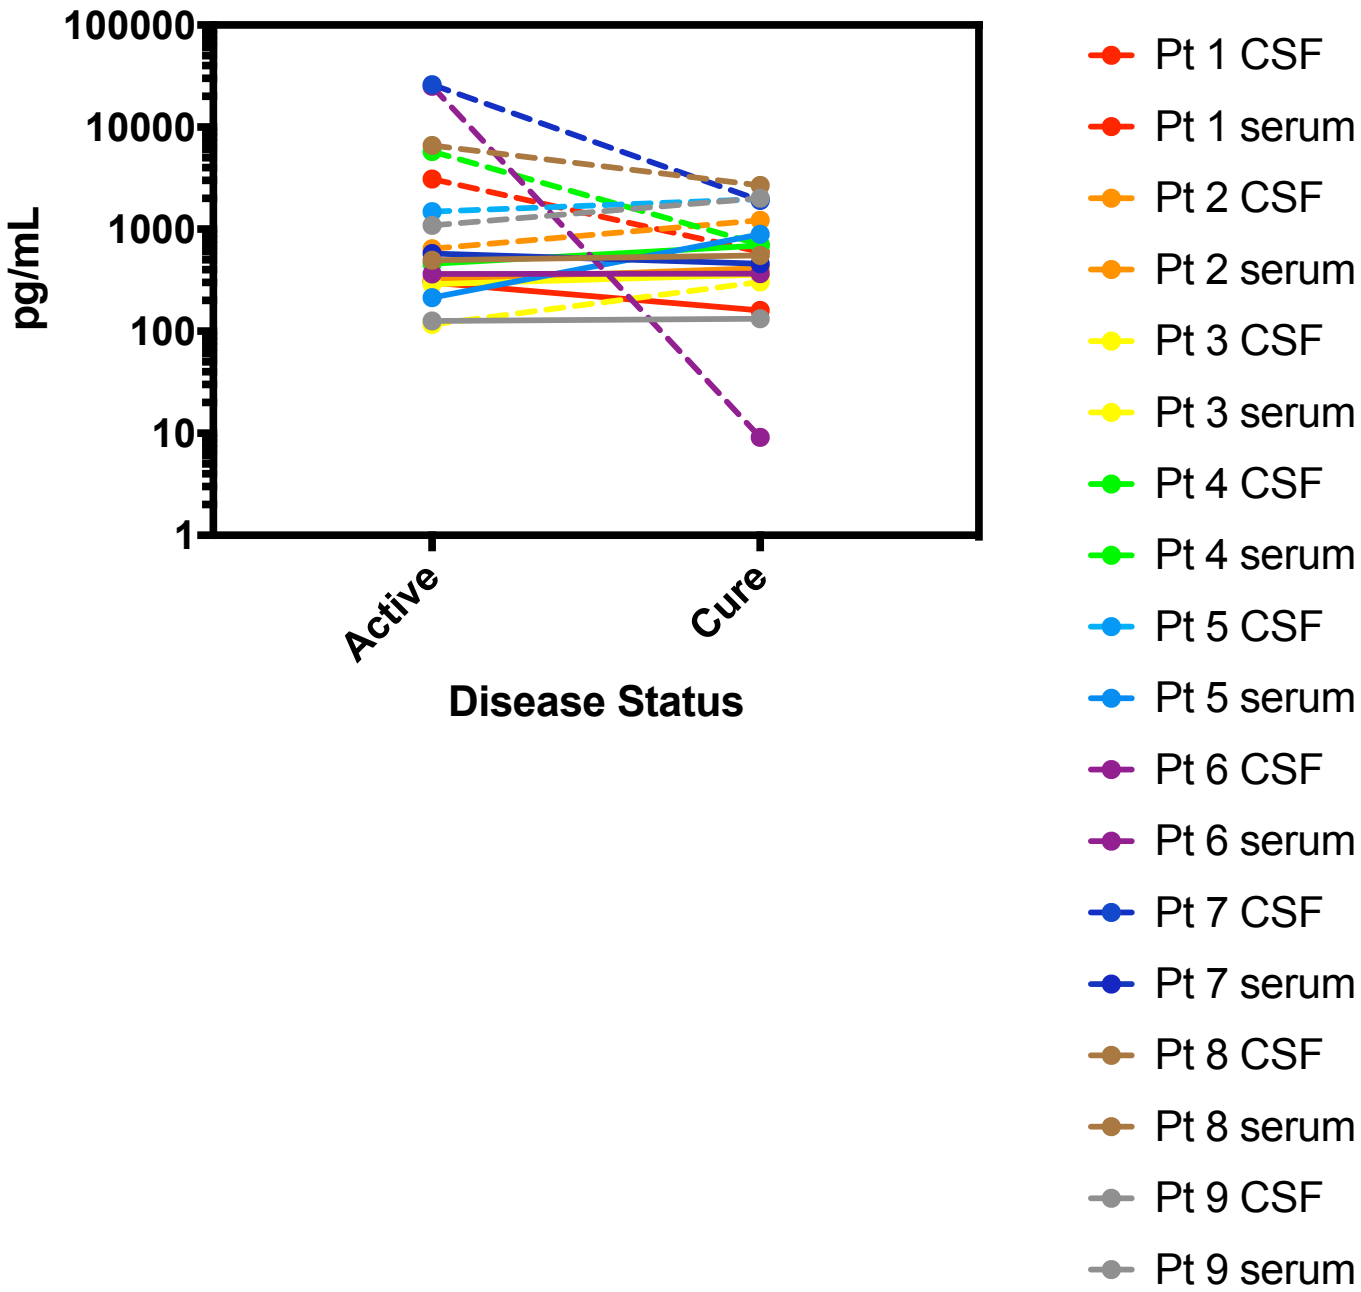



# MIP1a

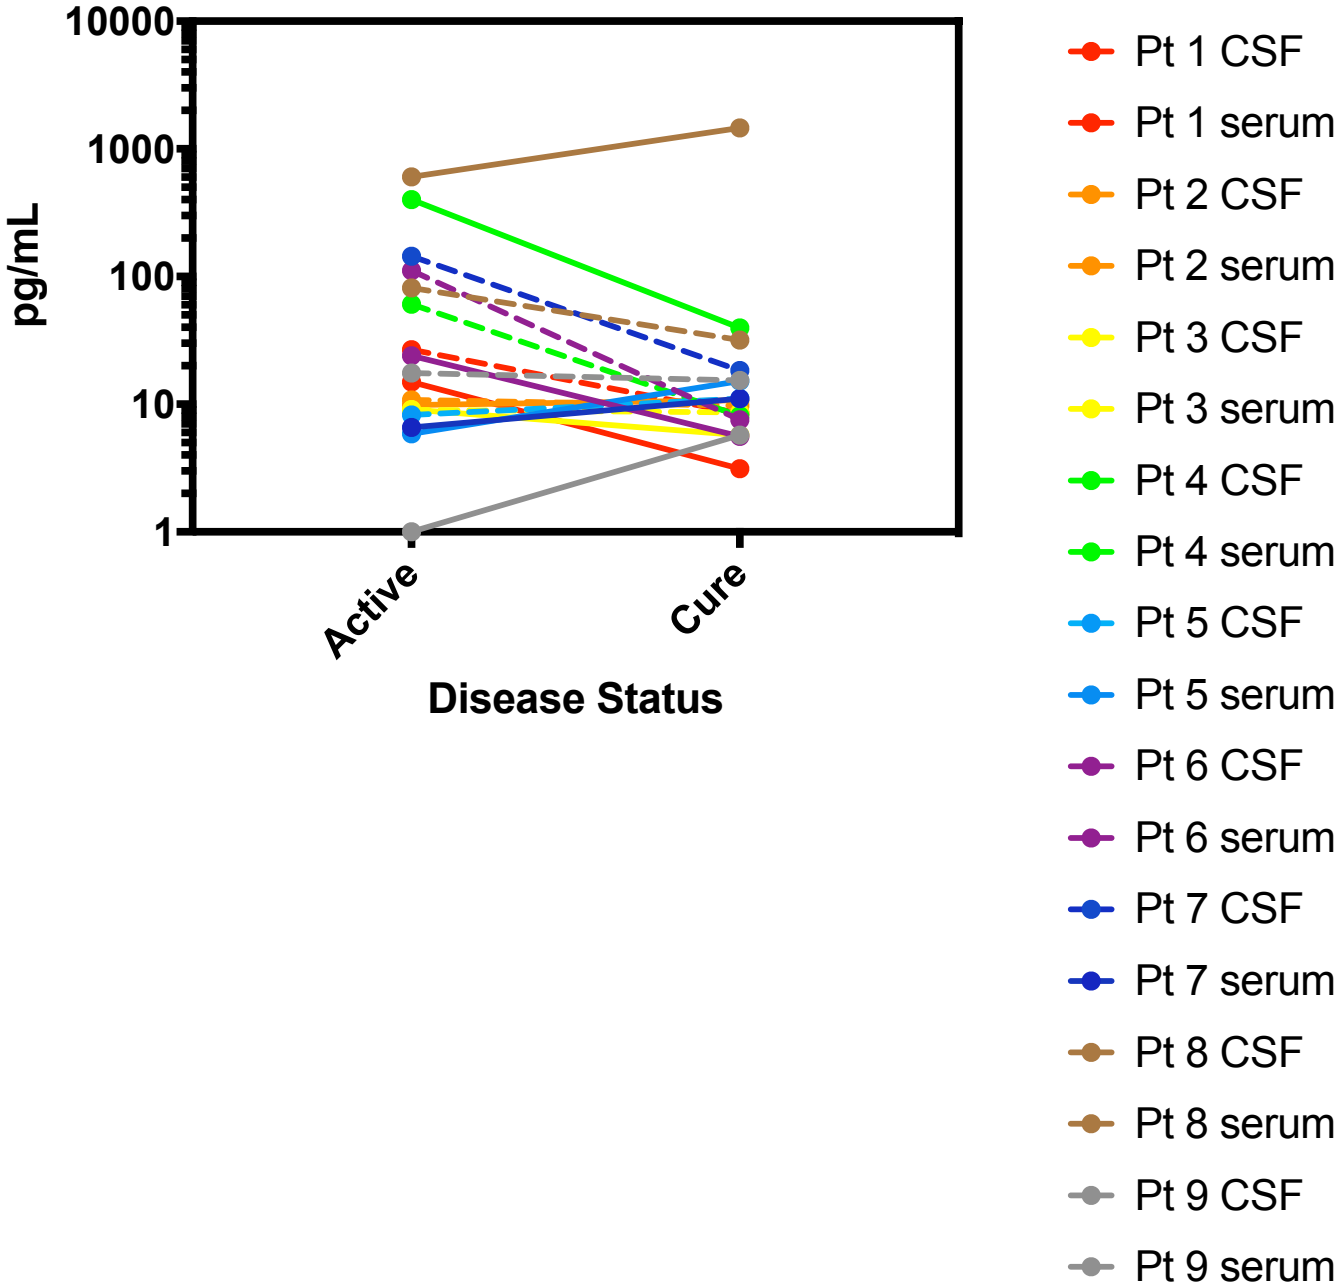

# MIP1b

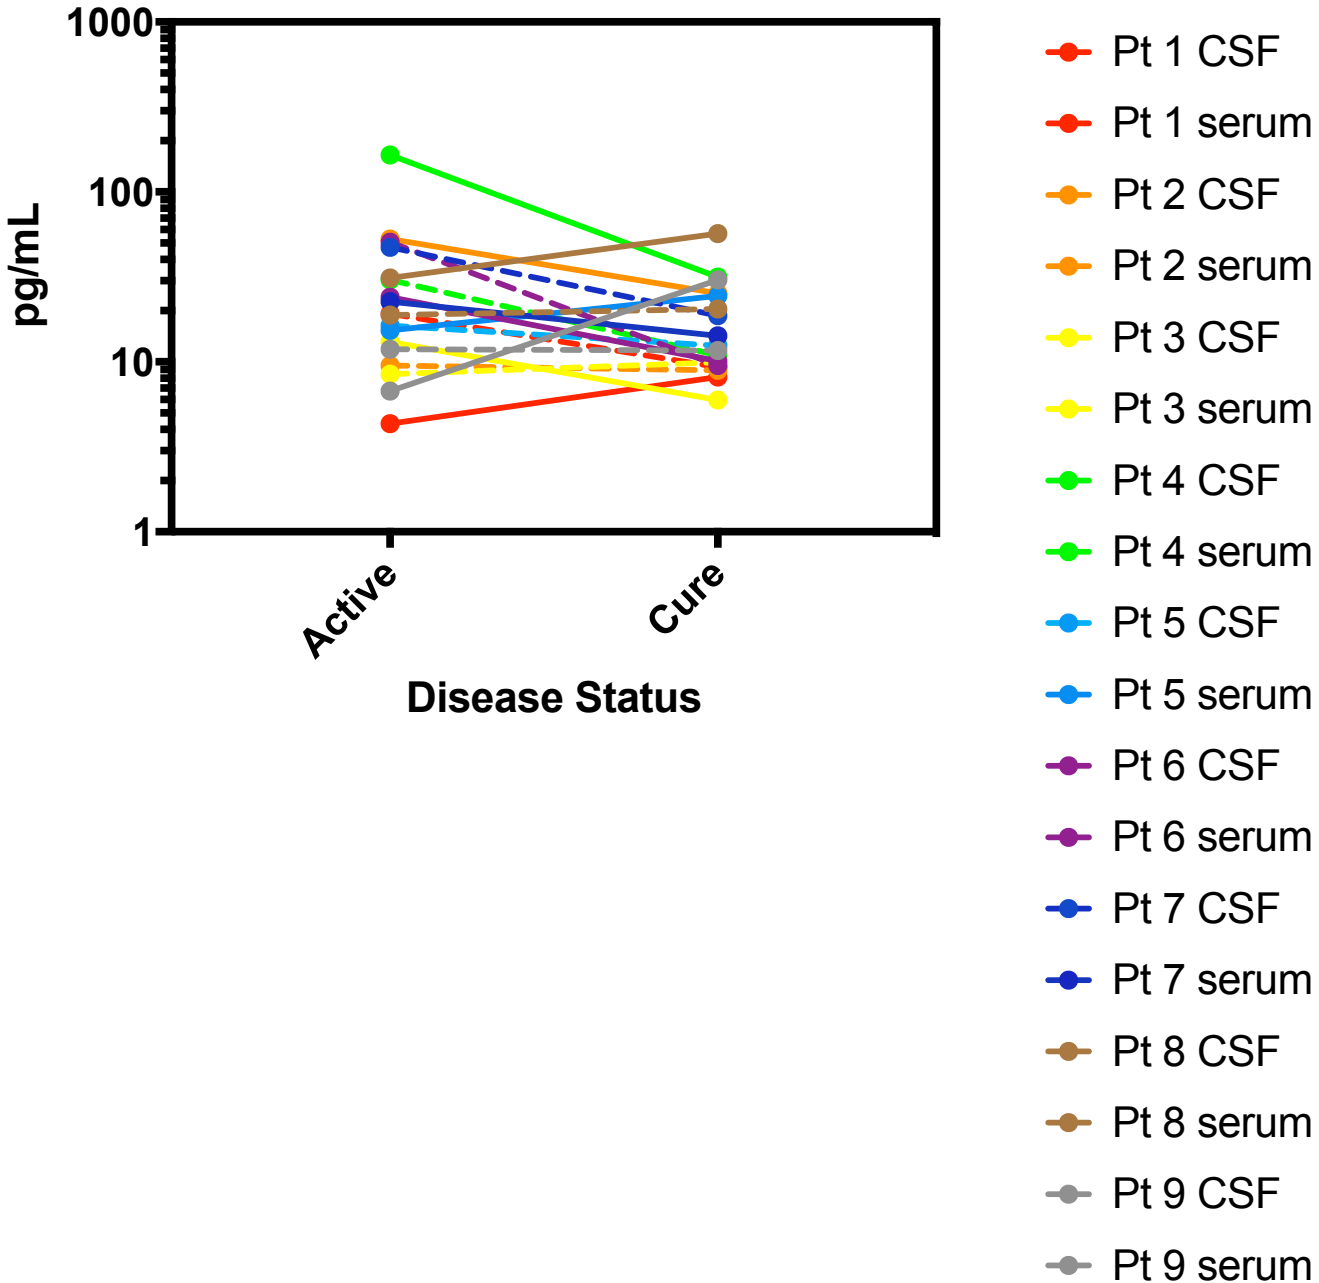

# TGFb1

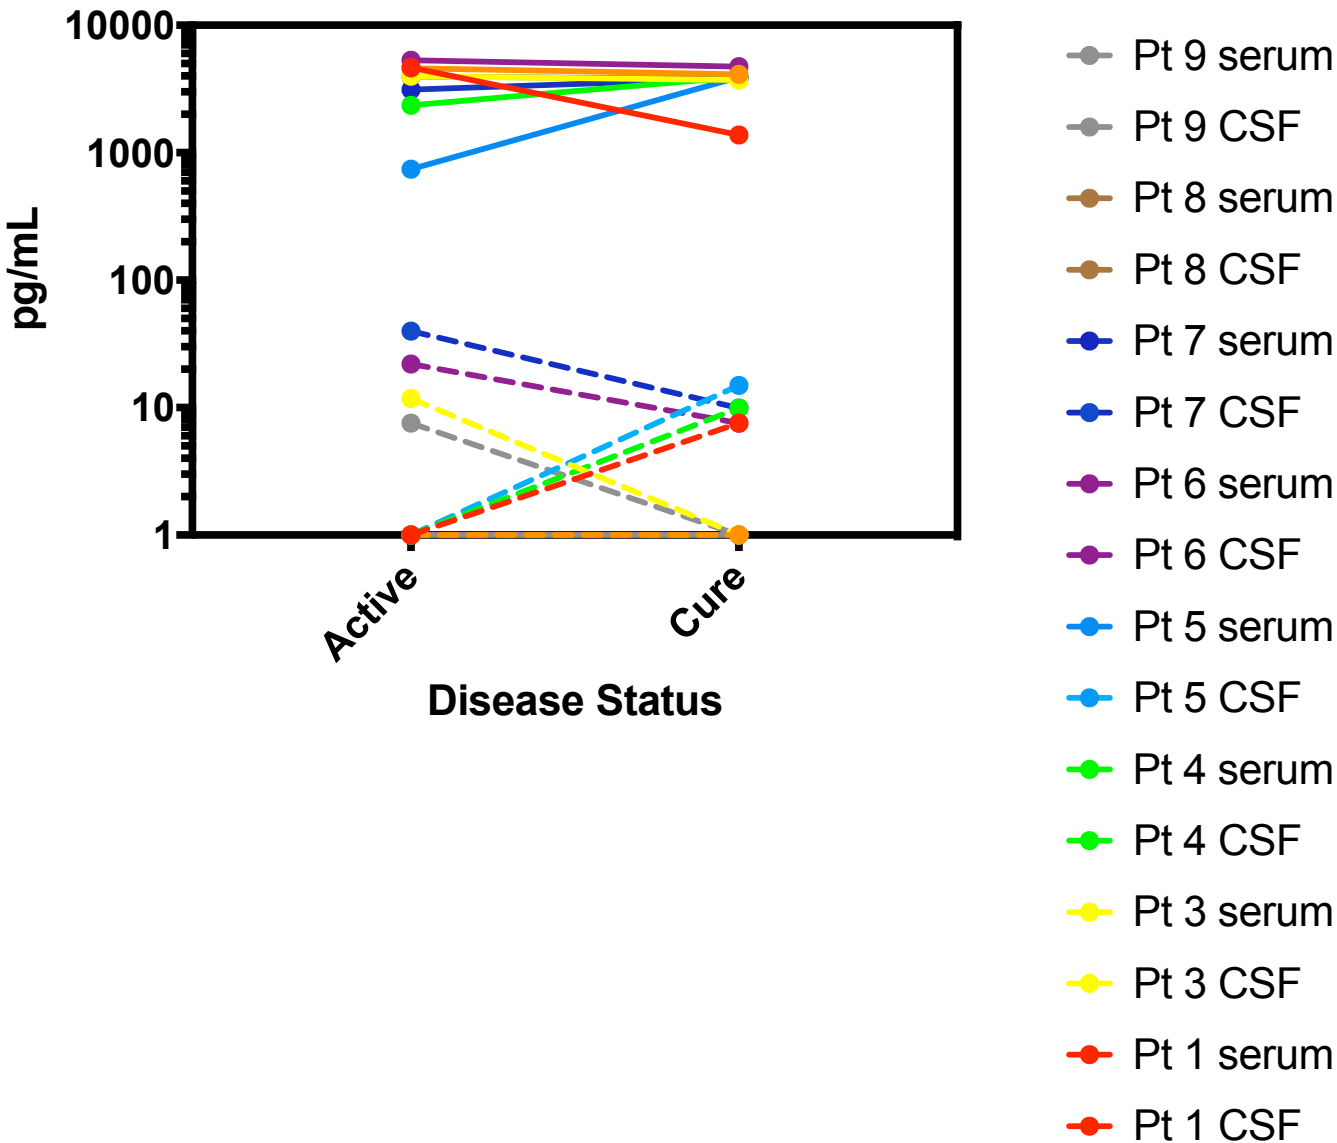

# TGFb2

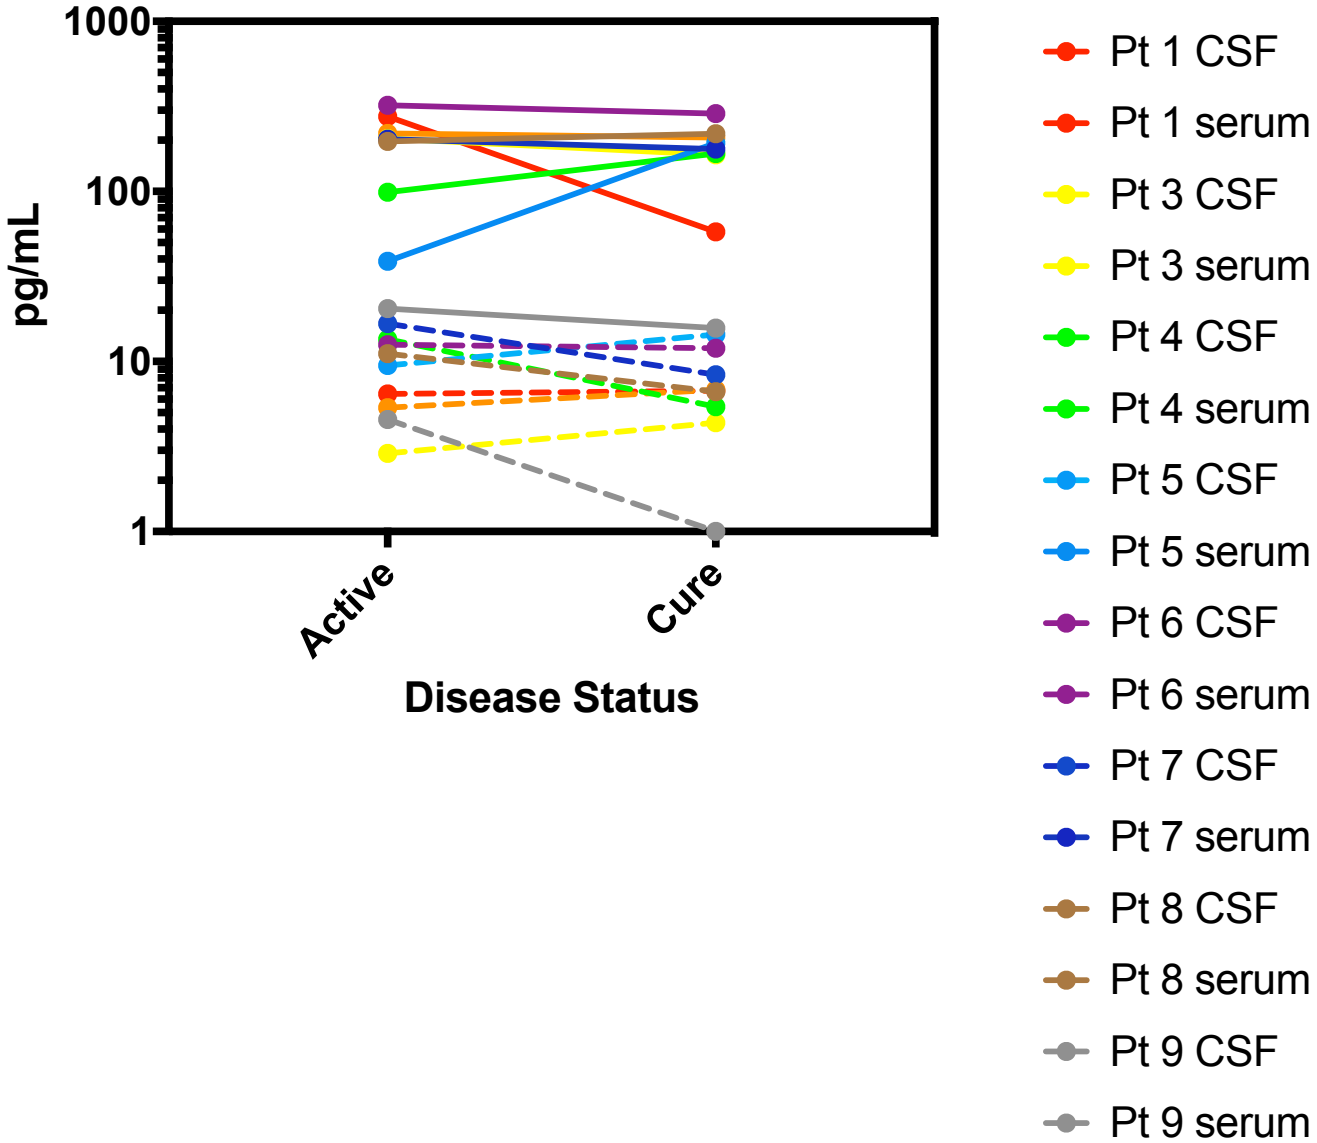

# TNF $\alpha$

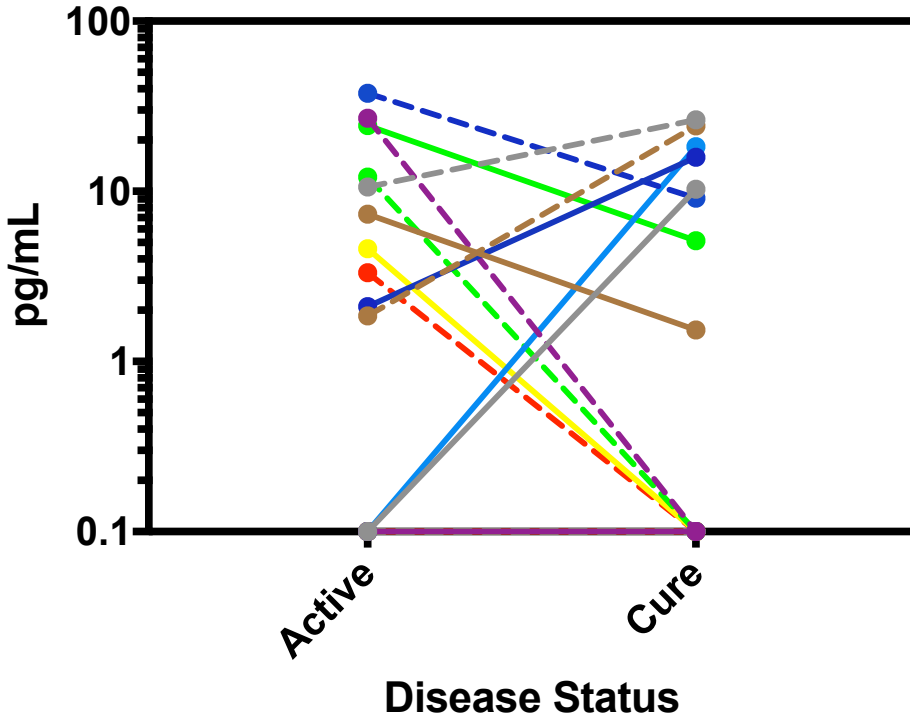

- Pt 1 CSF
- Pt 1 serum
- Pt 2 CSF
- Pt 2 serum
- Pt 3 CSF
- Pt 3 serum
- Pt 4 CSF
- Pt 4 serum
- Pt 5 CSF
- Pt 5 serum
- Pt 6 CSF
- Pt 6 serum
- Pt 7 CSF
- Pt 7 serum
- Pt 8 CSF
- Pt 8 serum
- Pt 9 CSF
- Pt 9 serum

# TNFb

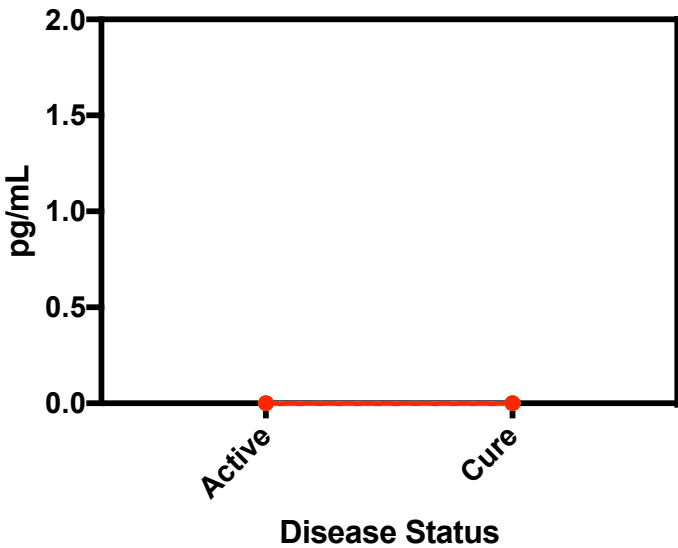

- Pt 9 serum
- Pt 9 CSF
- Pt 8 serum
- Pt 8 CSF
- Pt 7 serum
- Pt 7 CSF
- Pt 6 serum
- Pt 6 CSF
- Pt 5 serum
- Pt 5 CSF
- Pt 4 serum
- Pt 4 CSF
- Pt 3 serum
- Pt 3 CSF
- Pt 2 serum
- Pt 2 CSF
- Pt 1 serum
- Pt 1 CSF
