# Supplementary material
Source: PubMed Central journal article supplement (PMC8096242)
Supplement: ciaa1128_suppl_supplementary_figure2.pdf [file ciaa1128_suppl_supplementary_figure2.pdf]

Correlation of Active with metadata

|                                                     | GCSF (18) | GM-CSF (20) | IFN-α2 (22) | IFN-γ (25) | IL-10 (27) | IL-12p40 (29) | IL-12p70 (33) | IL-13 (35) | IL-17A (39) | IL-1ra (42) | IL-4 (53) | IL-5 (55) | IL-6 (57) | IL-6 (53) | IP-10 (65) | MCP-1 (67) | MIP-1a (72) | MIP-1b (73) | VEGF (78) | Steroid dose at LP 1 Ag | PCR    | Total anthelmintics<br>Time to cure | WBC    | Gluc   |        |        |        |        |
|-----------------------------------------------------|-----------|-------------|-------------|------------|------------|---------------|---------------|------------|-------------|-------------|-----------|-----------|-----------|-----------|------------|------------|-------------|-------------|-----------|-------------------------|--------|-------------------------------------|--------|--------|--------|--------|--------|--------|
| GCSF (18)                                           |           | 0.0032      | 0.0549      | 0.0523     | 0.0362     | 0.0047        | 0.0094        | 0.0297     | 0.0007      | 0.0074      | 0.0880    | 0.0458    | 0.0014    | 0.0031    | 0.0978     | 0.0037     | 0.0044      | 0.0145      | 0.5216    | 0.7334                  | 0.3384 | 0.2660                              | 0.1489 | 0.0881 | 0.8966 | 0.1590 |        |        |
| GM-CSF (20)                                         | 0.0032    |             | 0.0001      | 0.1490     | 0.0039     | 0.0002        | 0.0018        | 0.0030     | 0.0005      | 0.0021      | 0.0012    | 0.0245    | 0.0108    | 0.0098    | 0.1650     | 0.0023     | 0.0986      | 0.0130      | 0.0869    | 0.9549                  | 0.6248 | 0.4564                              | 0.0032 | 0.2257 | 0.8455 | 0.2799 |        |        |
| IFN-α2 (22)                                         | 0.0549    | 0.0001      |             | 0.0173     | 0.0070     | 0.0006        | 0.0001        | 0.0061     | 0.0003      | 0.0031      | 0.0009    | 0.1414    | 0.0141    | 0.0213    | 0.0423     | 0.0016     | 0.0812      | 0.0013      | 0.0188    | 0.5805                  | 0.3986 | 0.3299                              | 0.0164 | 0.9612 | 0.5434 | 0.0932 |        |        |
| IFN-γ (25)                                          | 0.0523    | 0.1490      | 0.0173      |            | 0.0324     | 0.1306        | 0.0385        | 0.0008     | 0.0154      | 0.0011      | 0.1377    | 0.1962    | 0.0320    | 0.0001    | 0.0030     | 0.0015     | 0.0006      | 0.0196      | 0.0821    | 0.8960                  | 0.4293 | 0.6199                              | 0.5496 | 0.9870 | 0.7941 | 0.0363 |        |        |
| IL-10 (27)                                          | 0.0362    | 0.0039      | 0.0070      | 0.0324     |            | 0.0239        | 0.0019        | 0.0005     | 0.0130      | 0.0005      | 0.0002    | 0.0000    | 0.0002    | 0.0046    | 0.0271     | 0.0046     | 0.0153      | 0.0110      | 0.2685    | 0.2409                  | 0.4564 | 0.2169                              | 0.0005 | 0.1144 | 0.0412 | 0.0628 |        |        |
| IL-12p40 (29)                                       | 0.0047    | 0.0002      | 0.0006      | 0.1306     | 0.0239     |               | 0.0000        | 0.0609     | 0.0000      | 0.0387      | 0.0012    | 0.0614    | 0.0025    | 0.0325    | 0.0978     | 0.0079     | 0.0685      | 0.0019      | 0.0263    | 0.9924                  | 0.2864 | 0.8582                              | 0.0006 | 0.6326 | 0.6461 | 0.0263 |        |        |
| IL-12p70 (33)                                       | 0.0094    | 0.0018      | 0.0001      | 0.0285     | 0.0019     | 0.0000        |               | 0.0192     | 0.0000      | 0.0203      | 0.0000    | 0.0081    | 0.0000    | 0.0125    | 0.0342     | 0.0011     | 0.0423      | 0.0011      | 0.1032    | 0.2264                  | 0.5561 | 0.5710                              | 0.0026 | 0.9781 | 0.8784 | 0.0147 |        |        |
| IL-13 (35)                                          | 0.0297    | 0.0036      | 0.0061      | 0.0306     | 0.0005     | 0.0059        | 0.0192        |            | 0.0124      | 0.0002      | 0.0021    | 0.0023    | 0.0070    | 0.0242    | 0.0049     | 0.0000     | 0.0026      | 0.0257      | 0.0656    | 0.3620                  | 0.5339 | 0.3636                              | 0.0183 | 0.8485 | 0.4744 | 0.0564 |        |        |
| IL-17A (39)                                         | 0.0007    | 0.0005      | 0.0003      | 0.0154     | 0.0130     | 0.0000        | 0.0000        | 0.0124     |             | 0.0281      | 0.0008    | 0.0059    | 0.0001    | 0.0066    | 0.0289     | 0.0002     | 0.0201      | 0.0242      | 0.0846    | 0.5028                  | 0.1660 | 0.7814                              | 0.0182 | 0.8496 | 0.7344 | 0.0057 |        |        |
| IL-1ra (42)                                         | 0.0074    | 0.0021      | 0.0021      | 0.0011     | 0.0005     | 0.0287        | 0.0203        | 0.0002     | 0.0281      |             | 0.0478    | 0.0573    | 0.0275    | 0.0001    | 0.0156     | 0.0069     | 0.0002      | 0.0006      | 0.0843    | 0.7899                  | 0.8796 | 0.2513                              | 0.0751 | 0.0591 | 0.3873 | 0.0670 |        |        |
| IL-4 (53)                                           | 0.0880    | 0.0012      | 0.0009      | 0.1377     | 0.0002     | 0.0012        | 0.0000        | 0.0021     | 0.0000      | 0.0021      |           | 0.0208    | 0.0478    | 0.0003    | 0.0002     | 0.0418     | 0.0594      | 0.0011      | 0.1073    | 0.0243                  | 0.0794 | 0.0269                              | 0.4994 | 0.8943 | 0.0000 | 0.8715 | 0.7000 | 0.0805 |
| IL-5 (55)                                           | 0.0458    | 0.0245      | 0.1414      | 0.1962     | 0.0000     | 0.0614        | 0.0081        | 0.0023     | 0.0259      | 0.0573      | 0.0003    |           | 0.0001    | 0.0045    | 0.0063     | 0.0449     | 0.1069      | 0.4116      | 0.0774    | 0.9160                  | 0.1391 | 0.0002                              | 0.3141 | 0.0547 | 0.0533 |        |        |        |
| IL-6 (57)                                           | 0.0014    | 0.0108      | 0.0141      | 0.0320     | 0.0002     | 0.0025        | 0.0000        | 0.0070     | 0.0001      | 0.0275      | 0.0002    | 0.0001    |           | 0.0013    | 0.0045     | 0.0006     | 0.0064      | 0.0183      | 0.4991    | 0.2446                  | 0.7269 | 0.6901                              | 0.0026 | 0.5065 | 0.3478 | 0.0187 |        |        |
| IL-6 (53)                                           | 0.0031    | 0.0098      | 0.0213      | 0.0001     | 0.0046     | 0.0325        | 0.0125        | 0.0042     | 0.0066      | 0.0001      | 0.0418    | 0.0571    | 0.0013    |           | 0.0011     | 0.0071     | 0.0000      | 0.0016      | 0.2685    | 0.8458                  | 0.7462 | 0.6485                              | 0.1241 | 0.3319 | 0.4607 | 0.0211 |        |        |
| IP-10 (65)                                          | 0.0978    | 0.1650      | 0.0423      | 0.0020     | 0.0271     | 0.0978        | 0.0342        | 0.0049     | 0.0289      | 0.0156      | 0.0594    | 0.0404    | 0.0045    | 0.0011    |            | 0.0114     | 0.0002      | 0.0256      | 0.1938    | 0.7892                  | 0.5816 | 0.9524                              | 0.1367 | 0.9604 | 0.5258 | 0.0012 |        |        |
| MCP-1 (67)                                          | 0.0037    | 0.0023      | 0.0016      | 0.0015     | 0.0046     | 0.0079        | 0.0011        | 0.0000     | 0.0002      | 0.0069      | 0.0011    | 0.0063    | 0.0006    | 0.0071    | 0.0114     |            | 0.0071      | 0.0185      | 0.1486    | 0.1626                  | 0.2681 | 0.6886                              | 0.0401 | 0.8737 | 0.9439 | 0.0171 |        |        |
| MIP-1a (72)                                         | 0.0044    | 0.0986      | 0.0812      | 0.0006     | 0.0153     | 0.0685        | 0.0423        | 0.0026     | 0.0301      | 0.0002      | 0.1073    | 0.0449    | 0.0064    | 0.0000    | 0.0002     | 0.0071     |             | 0.0008      | 0.1835    | 0.9729                  | 0.6405 | 0.4632                              | 0.1518 | 0.3976 | 0.6017 | 0.0013 |        |        |
| MIP-1b (73)                                         | 0.0145    | 0.0130      | 0.0013      | 0.0196     | 0.0110     | 0.0019        | 0.0011        | 0.0257     | 0.0342      | 0.0006      | 0.0243    | 0.1069    | 0.0183    | 0.0016    | 0.0256     | 0.0185     | 0.0008      |             | 0.0217    | 0.7080                  | 0.6405 | 0.9694                              | 0.0254 | 0.5193 | 0.8625 | 0.0024 |        |        |
| VEGF (78)                                           | 0.5216    | 0.0869      | 0.0188      | 0.0821     | 0.2685     | 0.0263        | 0.1032        | 0.0606     | 0.0846      | 0.0843      | 0.0794    | 0.4116    | 0.4991    | 0.2685    | 0.1938     | 0.1486     | 0.1835      | 0.0217      |           | 0.8516                  | 0.0213 | 0.4744                              | 0.0822 | 0.5566 | 0.3675 | 0.1240 |        |        |
| Steroid dose at LP time, in andersons equivalent Ag | 0.7334    | 0.9549      | 0.5805      | 0.8960     | 0.2409     | 0.5924        | 0.2264        | 0.3829     | 0.5036      | 0.7898      | 0.0928    | 0.0774    | 0.2446    | 0.9458    | 0.7892     | 0.1626     | 0.9729      | 0.7080      | 0.8516    |                         | 0.8919 | 0.3453                              | 0.2822 | 0.3392 | 0.2632 | 0.0538 |        |        |
| PCR                                                 | 0.3384    | 0.6248      | 0.3986      | 0.4293     | 0.4564     | 0.2864        | 0.5561        | 0.5339     | 0.1660      | 0.8796      | 0.4994    | 0.9160    | 0.7269    | 0.7462    | 0.5816     | 0.2681     | 0.6405      | 0.6405      | 0.0213    | 0.8919                  | 0.1618 | 0.6787                              | 0.0844 | 0.0319 | 0.9044 |        |        |        |
| Total anthelmintics previously, months              | 0.2660    | 0.4564      | 0.3299      | 0.6199     | 0.2169     | 0.8582        | 0.5710        | 0.5635     | 0.7614      | 0.2513      | 0.8943    | 0.1391    | 0.6901    | 0.6485    | 0.9524     | 0.6886     | 0.4632      | 0.9694      | 0.4744    | 0.3453                  | 0.1618 |                                     | 0.4092 | 0.0001 | 0.0115 | 0.6339 |        |        |
| Time to cure                                        | 0.1489    | 0.0032      | 0.0164      | 0.5496     | 0.0005     | 0.0066        | 0.0026        | 0.0183     | 0.0162      | 0.0751      | 0.0000    | 0.0002    | 0.0026    | 0.1241    | 0.1367     | 0.0401     | 0.1518      | 0.0254      | 0.0822    | 0.2822                  | 0.6787 | 0.4092                              |        | 0.6547 | 0.5846 | 0.1651 |        |        |
| WBC                                                 | 0.0881    | 0.2257      | 0.9612      | 0.9870     | 0.1144     | 0.6326        | 0.9781        | 0.6485     | 0.8496      | 0.0991      | 0.8715    | 0.3141    | 0.5065    | 0.3319    | 0.9654     | 0.8737     | 0.3976      | 0.5193      | 0.5566    | 0.3392                  | 0.0844 | 0.0001                              |        | 0.6547 |        | 0.0136 | 0.8893 |        |
| Gluc                                                | 0.8966    | 0.8455      | 0.5434      | 0.7941     | 0.0412     | 0.6461        | 0.9784        | 0.4744     | 0.7344      | 0.3873      | 0.7000    | 0.0547    | 0.3478    | 0.4607    | 0.5258     | 0.9439     | 0.6017      | 0.8625      | 0.3675    | 0.2632                  | 0.0319 | 0.0115                              |        | 0.5846 | 0.0136 | 0.7658 |        |        |
|                                                     | 0.1590    | 0.2799      | 0.0932      | 0.0363     | 0.0628     | 0.0263        | 0.0147        | 0.0554     | 0.0257      | 0.0670      | 0.0805    | 0.0533    | 0.0197    | 0.0211    | 0.0012     | 0.0171     | 0.0013      | 0.0024      | 0.1240    | 0.0038                  | 0.9044 | 0.6339                              |        | 0.1651 | 0.8893 | 0.7658 |        |        |

Correlation of Active with metadata R value

|                                                      | GCSF (18) | GM-CSF (20) | IFN- $\alpha$ 2 (22) | IFN- $\gamma$ (25) | IL-10 (27) | IL-12p40 (29) | IL-12p70 (33) | IL-13 (35) | IL-17A (39) | IL-1 $\alpha$ (42) | IL-4 (53) | IL-5 (55) | IL-6 (57) | IL-8 (53) | IL-10 (59) | MCP-1 (67) | MIP-1 $\alpha$ (72) | MIP-1 $\beta$ (73) | VEGF (76) | Steroid dose at LP in Ag | PCR     | Total arthralgias | p Time to cure | WBC     | Gluc    |         |         |
|------------------------------------------------------|-----------|-------------|----------------------|--------------------|------------|---------------|---------------|------------|-------------|--------------------|-----------|-----------|-----------|-----------|------------|------------|---------------------|--------------------|-----------|--------------------------|---------|-------------------|----------------|---------|---------|---------|---------|
| GCSF (18)                                            |           | 0.7020      | 0.4912               | 0.4963             | 0.5313     | 0.6804        | 0.6372        | 0.5489     | 0.7708      | 0.6414             | 0.4401    | 0.5055    | 0.7287    | 0.6902    | 0.4284     | 0.6814     | 0.6711              | 0.5975             | 0.1730    | 0.0625                   | -0.2561 | 0.2968            | 0.3780         | 0.4400  | 0.0363  | -0.3828 |         |
| GM-CSF (20)                                          | 0.7020    |             | 0.8094               | 0.3779             | 0.6912     | 0.7991        | 0.7324        | 0.7093     | 0.7390      | 0.5887             | 0.6178    | 0.4476    | 0.3646    | 0.7206    | 0.4294     | 0.6147     | 0.4415              |                    | -0.0154   | -0.1324                  | 0.2000  | 0.6888            | 0.3206         | -0.0500 | -0.2685 |         |         |
| IFN- $\alpha$ 2 (22)                                 | 0.4912    | 0.8094      |                      | 0.5849             | 0.6444     | 0.7636        | 0.8212        | 0.6524     | 0.7863      | 0.6907             | 0.7471    | 0.3648    | 0.5997    | 0.5695    | 0.5126     | 0.7228     | 0.4489              | 0.3714             | 0.5768    | -0.1605                  | 0.2266  | 0.2685            | 0.5888         | -0.0132 | -0.1842 | -0.4940 |         |
| IFN- $\gamma$ (25)                                   | 0.4963    | 0.3779      | 0.5849               |                    | 0.5358     | 0.3944        | 0.5210        | 0.7515     | 0.5595      | 0.7371             | 0.3878    | 0.3410    | 0.5368    | 0.8355    | 0.3711     | 0.7247     | 0.7631              | 0.5756             | 0.4476    | -0.0556                  | 0.2125  | 0.1343            | 0.7617         | -0.0344 | 0.0709  | -0.5435 |         |
| IL-10 (27)                                           | 0.5313    | 0.6912      | 0.6444               | 0.5358             |            | 0.5607        | 0.7294        | 0.7953     | 0.6053      | 0.7712             | 0.8058    | 0.8677    | 0.8015    | 0.6824    | 0.5506     | 0.6824     | 0.6029              | 0.6265             | 0.2943    | -0.3111                  | 0.2000  | 0.3265            | 0.7672         | 0.4118  | 0.5151  | -0.4915 |         |
| IL-12p40 (29)                                        | 0.6804    | 0.7991      | 0.7636               | 0.3944             | 0.5607     |               | 0.8603        | 0.4783     | 0.9064      | 0.5006             | 0.7255    | 0.4775    | 0.6995    | 0.5357    | 0.4384     | 0.6372     | 0.4865              | 0.7138             | 0.5330    | -0.1449                  | -0.2840 | 0.0486            | 0.6479         | 0.1295  | -0.1344 | -0.5707 |         |
| IL-12p70 (33)                                        | 0.6372    | 0.7324      | 0.8212               | 0.5210             | 0.7294     | 0.8603        |               | 0.5953     | 0.9043      | 0.5416             | 0.8388    | 0.6357    | 0.8415    | 0.6176    | 0.5314     | 0.7529     | 0.5178              | 0.7529             | 0.4224    | -0.3203                  | -0.1588 | 0.1559            | 0.6992         | -0.0088 | 0.0074  | -0.6148 |         |
| IL-13 (35)                                           | 0.5489    | 0.7059      | 0.6534               | 0.7513             | 0.7863     | 0.4783        | 0.5953        |            | 0.6082      | 0.8065             | 0.7100    | 0.7052    | 0.6445    | 0.6882    | 0.6657     | 0.8824     | 0.7147              | 0.5618             | 0.4709    | -0.2341                  | -0.1676 | 0.1559            | 0.5809         | 0.1235  | 0.1928  | -0.5040 |         |
| IL-17A (39)                                          | 0.7708    | 0.7703      | 0.7883               | 0.5935             | 0.6963     | 0.9064        | 0.9043        | 0.6082     |             | 0.5475             | 0.7488    | 0.5542    | 0.8188    | 0.6480    | 0.5465     | 0.8056     | 0.5420              | 0.6745             | 0.4444    | -0.1905                  | -0.3638 | 0.0825            | 0.5899         | 0.0515  | -0.0691 | -0.5725 |         |
| IL-1 $\alpha$ (42)                                   | 0.6414    | 0.7088      | 0.6907               | 0.7571             | 0.7712     | 0.5336        | 0.5416        | 0.6085     | 0.5475      |                    | 0.3015    | 0.4843    | 0.3483    | 0.3556    | 0.3923     | 0.8461     | 0.7865              | 0.7836             | 0.4448    | 0.0724                   | 0.0410  | 0.3388            | 0.4571         | 0.4815  | 0.2320  | -0.4846 |         |
| IL-4 (53)                                            | 0.4401    | 0.7328      | 0.7461               | 0.3878             | 0.6958     | 0.7325        | 0.8388        | 0.7100     | 0.7488      | 0.5015             |           | 0.7920    | 0.8207    | 0.5137    | 0.4609     | 0.7383     | 0.4178              | 0.5592             | 0.4512    | -0.4443                  | -0.1622 | 0.0391            | 0.9126         | -0.0340 | 0.1045  | -0.4653 |         |
| IL-5 (55)                                            | 0.5055    | 0.5587      | 0.3846               | 0.3410             | 0.8577     | 0.4775        | 0.6357        | 0.7052     | 0.5542      | 0.4843             | 0.7920    |           | 0.8329    | 0.4847    | 0.5168     | 0.6508     | 0.5073              | 0.4183             | 0.2306    | -0.4538                  | 0.0287  | 0.3885            | 0.8059         | 0.2868  | 0.4888  | -0.5078 |         |
| IL-6 (57)                                            | 0.7287    | 0.6178      | 0.5997               | 0.5368             | 0.8015     | 0.6998        | 0.8415        | 0.6445     | 0.8168      | 0.5493             | 0.8007    | 0.8329    |           | 0.7304    | 0.6706     | 0.7630     | 0.6504              | 0.5808             | 0.1824    | -0.3088                  | -0.0948 | 0.1062            | 0.6992         | 0.1793  | 0.2513  | -0.5833 |         |
| IL-8 (53)                                            | 0.6902    | 0.4676      | 0.5695               | 0.8295             | 0.6624     | 0.5307        | 0.6176        | 0.6882     | 0.6480      | 0.8256             | 0.5137    | 0.4847    | 0.7304    |           | 0.7365     | 0.6559     | 0.9118              | 0.7382             | 0.2943    | 0.0185                   | -0.0882 | 0.1235            | 0.4006         | 0.2588  | 0.1987  | -0.6880 |         |
| IP-10 (65)                                           | 0.4284    | 0.3648      | 0.5126               | 0.7111             | 0.5506     | 0.4284        | 0.5314        | 0.6657     | 0.5455      | 0.5923             | 0.4808    | 0.5168    | 0.8706    | 0.7365    |            | 0.8140     | 0.8030              | 0.5500             | 0.3427    | -0.0727                  | -0.1491 | 0.0162            | 0.3887         | -0.0118 | 0.1713  | -0.7529 |         |
| MCP-1 (67)                                           | 0.6814    | 0.7206      | 0.7226               | 0.7247             | 0.6824     | 0.6372        | 0.7529        | 0.8824     | 0.8056      | 0.6461             | 0.7383    | 0.6508    | 0.7630    | 0.6559    | 0.6140     |            | 0.6559              | 0.5882             | 0.3782    | -0.3665                  | -0.2941 | 0.1088            | 0.5174         | -0.0441 | -0.0191 | -0.6041 |         |
| MIP-1 $\alpha$ (72)                                  | 0.6711    | 0.4294      | 0.4489               | 0.7631             | 0.6029     | 0.4669        | 0.5176        | 0.7147     | 0.5420      | 0.7962             | 0.4178    | 0.5073    | 0.6504    | 0.9118    | 0.8030     | 0.6559     |                     | 0.7676             | 0.3503    | 0.0092                   | -0.1265 | 0.1971            | 0.3735         | 0.2265  | 0.1413  | -0.7507 |         |
| MIP-1 $\beta$ (73)                                   | 0.5975    | 0.6147      | 0.7314               | 0.5768             | 0.6265     | 0.7138        | 0.7529        | 0.5818     | 0.6142      | 0.7025             | 0.5952    | 0.4183    | 0.3565    | 0.7382    | 0.5560     | 0.5882     | 0.7676              |                    | 0.5681    | -0.1016                  | 0.1265  | 0.0718            | 0.5558         | 0.1735  | -0.0211 | -0.7521 |         |
| VEGF (76)                                            | 0.1730    | 0.4415      | 0.5768               | 0.4476             | 0.2943     | 0.5530        | 0.4224        | 0.4709     | 0.4444      | 0.4448             | 0.4512    | 0.2208    | 0.1824    | 0.2943    | 0.3427     | 0.3782     | 0.3503              | 0.6681             |           | -0.0509                  | 0.3666  | 0.1628            | 0.4475         | -0.1580 | -0.2415 | -0.4150 |         |
| Steroid dose at LP time, in prednisone equivalent mg | 0.0925    | -0.0154     | -0.1495              | -0.0356            | -0.3111    | -0.1449       | -0.3203       | -0.2341    | -0.1805     | 0.0724             | -0.4343   | -0.4538   | -0.3088   | 0.0185    | -0.0727    | -0.3665    | 0.0092              | -0.1016            | -0.0509   |                          | 0.0370  | 0.2526            | -0.2864        | 0.2557  | -0.5975 | 0.5069  |         |
| Ag                                                   | -0.2561   | -0.1324     | -0.2266              | -0.2125            | 0.2000     | -0.2840       | -0.1588       | -0.1676    | -0.3638     | 0.0412             | -0.1822   | 0.0287    | -0.0948   | -0.0882   | -0.1491    | -0.2941    | -0.1265             | -0.0595            | -0.0070   |                          | -0.0070 |                   | -0.1123        | 0.4471  | 0.5372  | 0.0340  |         |
| PCR                                                  | 0.2968    | -0.2000     | 0.2626               | 0.1343             | -0.3265    | 0.0486        | 0.1529        | -0.1559    | 0.0825      | -0.3046            | 0.0361    | -0.3885   | -0.1082   | -0.1235   | -0.0162    | 0.1088     | -0.1971             | -0.0118            | 0.1928    |                          | -0.2526 | 0.3676            |                | -0.2217 | -0.8353 | -0.6137 | -0.1340 |
| Total arthralgias previously, months                 | 0.3780    | 0.8888      | 0.5888               | 0.1617             | 0.7872     | 0.6479        | 0.6992        | 0.5809     | 0.5899      | 0.4571             | 0.9128    | 0.8059    | 0.6992    | 0.4006    | 0.3887     | 0.5174     | 0.3755              | 0.5558             | 0.4475    |                          | -0.2864 | -0.1123           | 0.2217         |         | 0.1212  | 0.1479  | -0.3777 |
| Time to cure                                         | 0.4400    | 0.3206      | -0.0132              | -0.0044            | 0.4118     | 0.1295        | -0.0088       | 0.1235     | 0.0515      | 0.4812             | -0.0440   | 0.3688    | 0.1793    | 0.2588    | -0.0118    | -0.0441    | 0.2265              | 0.1735             | -0.1898   |                          | 0.2557  | 0.4471            | 0.8383         |         | 0.1212  | 0.0619  | 0.0363  |
| WBC                                                  | 0.0383    | -0.0630     | -0.1842              | 0.0109             | 0.5151     | -0.1244       | 0.0074        | 0.1928     | -0.0621     | 0.2203             | 0.1045    | -0.4888   | 0.2513    | 0.1867    | 0.1713     | -0.0791    | 0.1813              | -0.0471            | -0.2415   |                          | -0.2975 | 0.5372            | 0.6137         |         | 0.1479  | 0.6078  | -0.0841 |
| Gluc                                                 | -0.3828   | -0.2985     | -0.4490              | -0.5435            | -0.4915    | -0.5707       | -0.6148       | -0.5040    | -0.5725     | -0.4848            | -0.4653   | -0.5078   | -0.5933   | -0.5880   | -0.7529    | -0.6041    | -0.7507             | -0.7221            | -0.4150   |                          | 0.5069  | 0.0340            | -0.1340        |         | -0.3777 | 0.0393  | -0.0841 |
